# Supplementary material for: One-pot multi-step cascade protocols toward β-indolyl sulfoximidoyl amides via intermolecular trapping of an α-indolylpalladium complex by CO
Source: Royal Society of Chemistry journal article supplement (doi:10.1039/d1ob00128k), 2021-01-01

## Supporting Information

# **Pd-catalyzed Multicomponent Cascade Protocols to $\beta$ -Indolyl Sulfoximidoyl Amides via Intermolecular Trapping of $\alpha$ - Indolylpalladium Complex by CO**

Huahua Liu, Li Wei, and Zhiyuan Chen\*

Key Laboratory of Functional Small Organic Molecules, Ministry of Education and  
Jiangxi Key Laboratory of Green Chemistry, College of Chemistry & Chemical  
Engineering, Jiangxi Normal University, 99Ziyang Road, Nanchang, Jiangxi 330022  
(P. R. China).

E-mail: zchen@jxnu.edu.cn

## Contents

1. The substrates employed in this study (S2)
2.  $^1\text{H}$  and  $^{13}\text{C}$  NMR spectra of all new compounds 4-6 (S3-S36)
3.  $^1\text{H}$  and  $^{13}\text{C}$  NMR Spectra of compound 8 (S37)
4. X-ray crystal structure of compound 4v (S38-S39)

## 1. The substrates employed in this study.

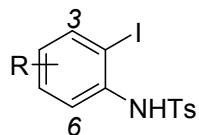

R = H, **1a**  
 R = 3-Cl, **1b**  
 R = 4-Me, **1c**  
 R = 4-MeO, **1d**  
 R = 4-F, **1e**  
 R = 4-Cl, **1f**  
 R = 5-Me, **1g**  
 R = 5-F, **1h**  
 R = 5-Cl, **1i**  
 R = 5-Br, **1j**  
 R = 4-CF<sub>3</sub>, **1k**

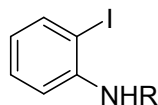

R = Ac, **1l**  
 R = Boc, **1m**

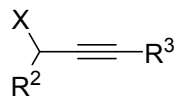

R<sup>2</sup> = R<sup>3</sup> = H, **2a**  
 R<sup>2</sup> = R<sup>3</sup> = Me, **2b**  
 R<sup>2</sup> = R<sup>3</sup> = Ph, **2c**  
 R<sup>2</sup> = H, R<sup>3</sup> = Ph, **2d**

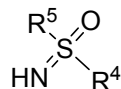

R<sup>4</sup> = Ph, R<sup>5</sup> = Me, **3a**  
 R<sup>4</sup> = Ph, R<sup>5</sup> = Et, **3b**  
 R<sup>4</sup> = Ph, R<sup>5</sup> = cyclopropyl, **3c**  
 R<sup>4</sup> = Ph, R<sup>5</sup> = Bn, **3d**  
 R<sup>4</sup> = 2-Naph, R<sup>5</sup> = Me, **3e**  
 R<sup>4</sup> = Ph, R<sup>5</sup> = Ph, **3f**  
 R<sup>4</sup> = Ph, R<sup>5</sup> = 4-MeC<sub>6</sub>H<sub>4</sub>, **3g**  
 R<sup>4</sup> = R<sup>5</sup> = 4-ClC<sub>6</sub>H<sub>4</sub>, **3h**  
 R<sup>4</sup> = 4-MeC<sub>6</sub>H<sub>4</sub>, R<sup>5</sup> = 4-BzC<sub>6</sub>H<sub>4</sub>, **3i**

## 2. $^1\text{H}$ and $^{13}\text{C}$ NMR Spectra of all new compounds 4-6.

### $^1\text{H}$ NMR spectrum (400 MHz, $\text{CDCl}_3$ ) of 4a.

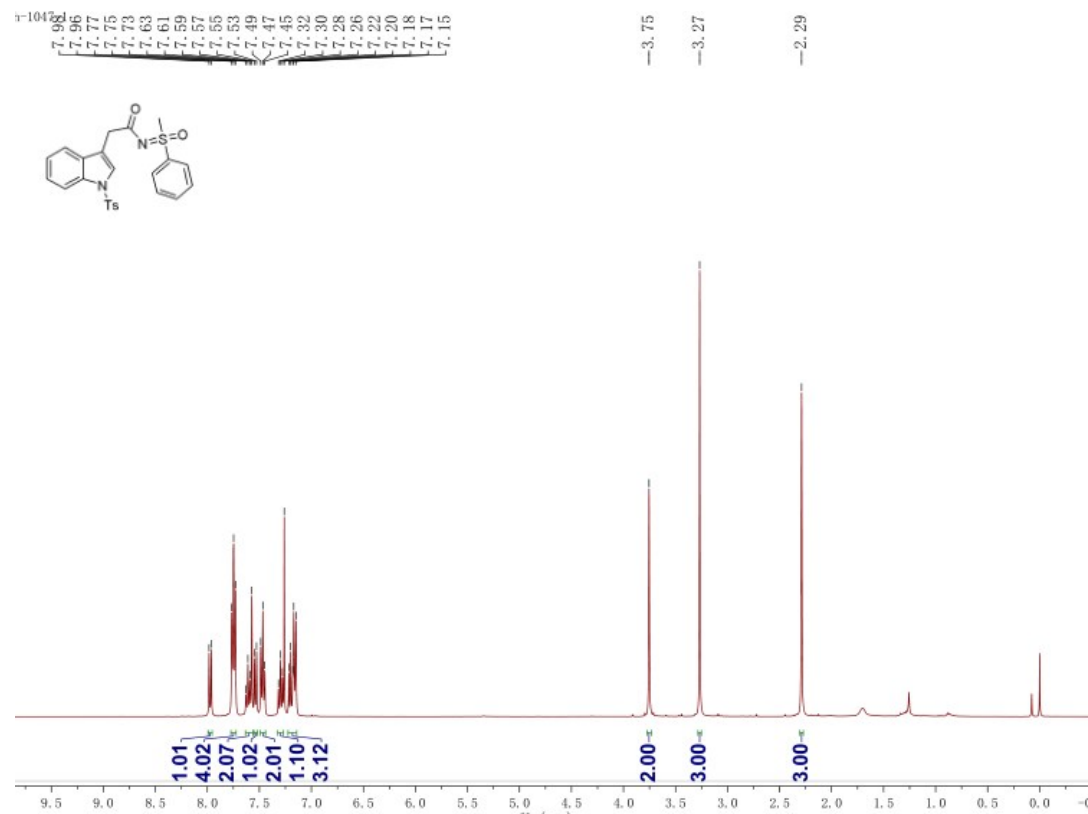

### $^{13}\text{C}$ NMR spectrum (100 MHz, $\text{CDCl}_3$ ) of 4a

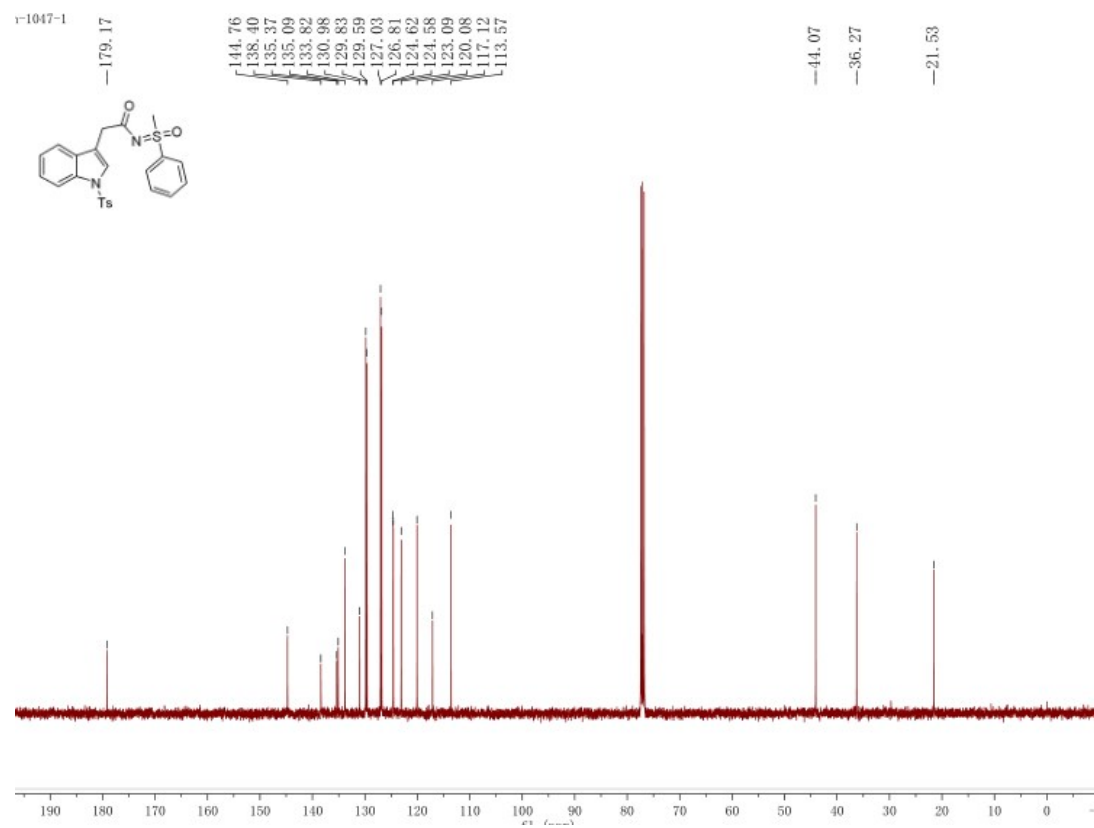

### <sup>1</sup>H NMR spectrum (400 MHz, CDCl<sub>3</sub>) of 4b

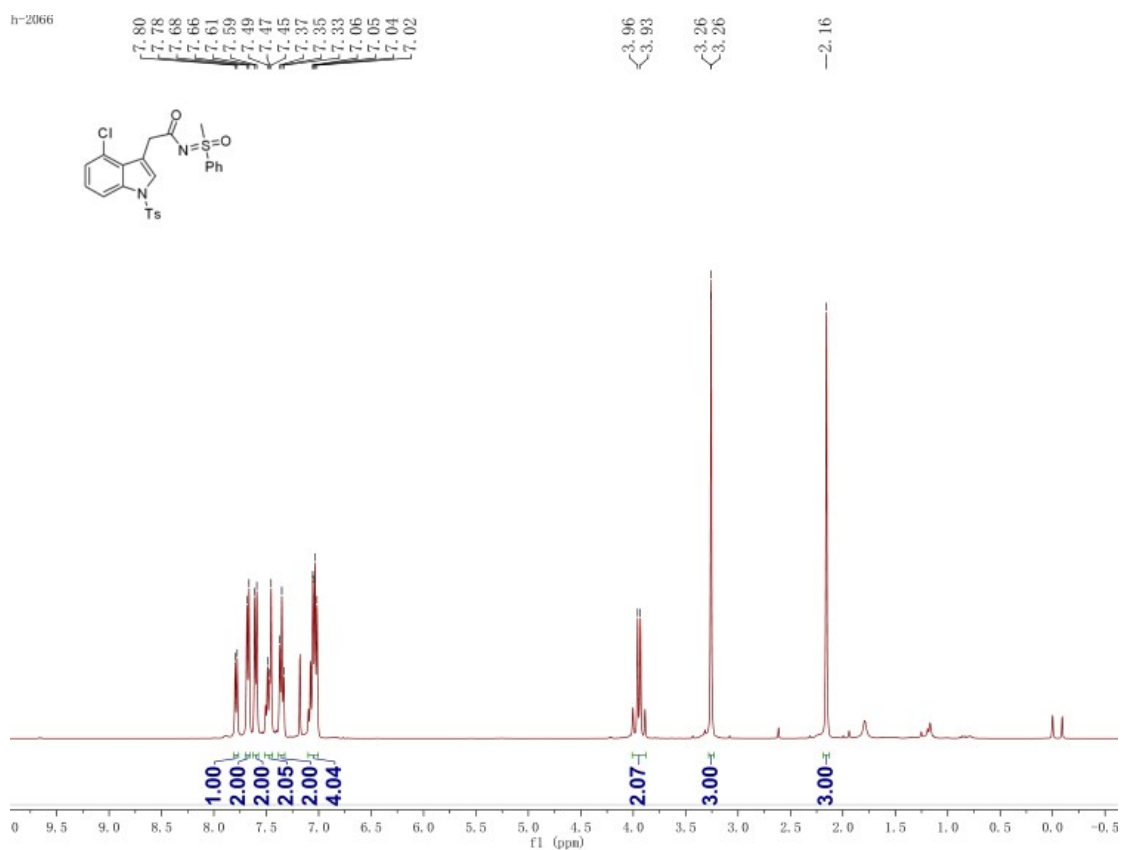

### <sup>13</sup>C NMR spectrum (100 MHz, CDCl<sub>3</sub>) of 4b

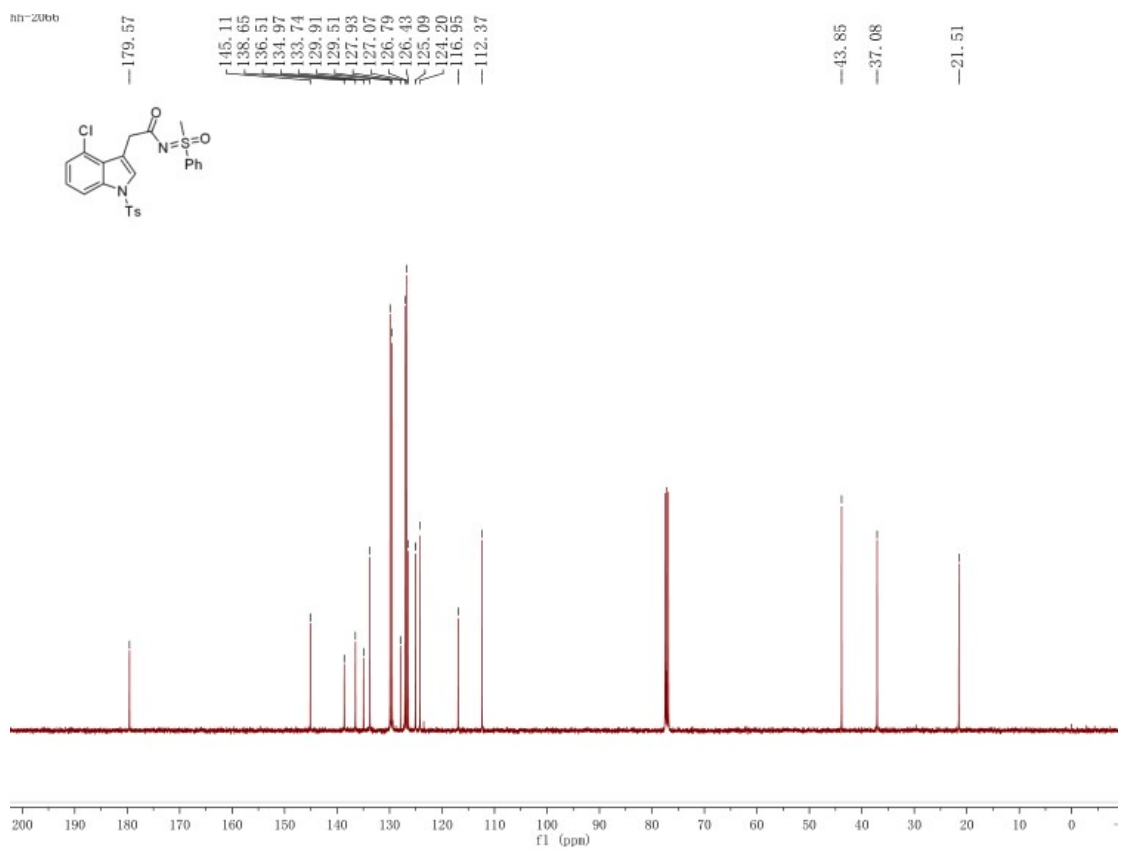

### $^1\text{H}$ NMR spectrum (400 MHz, $\text{CDCl}_3$ ) of 4c

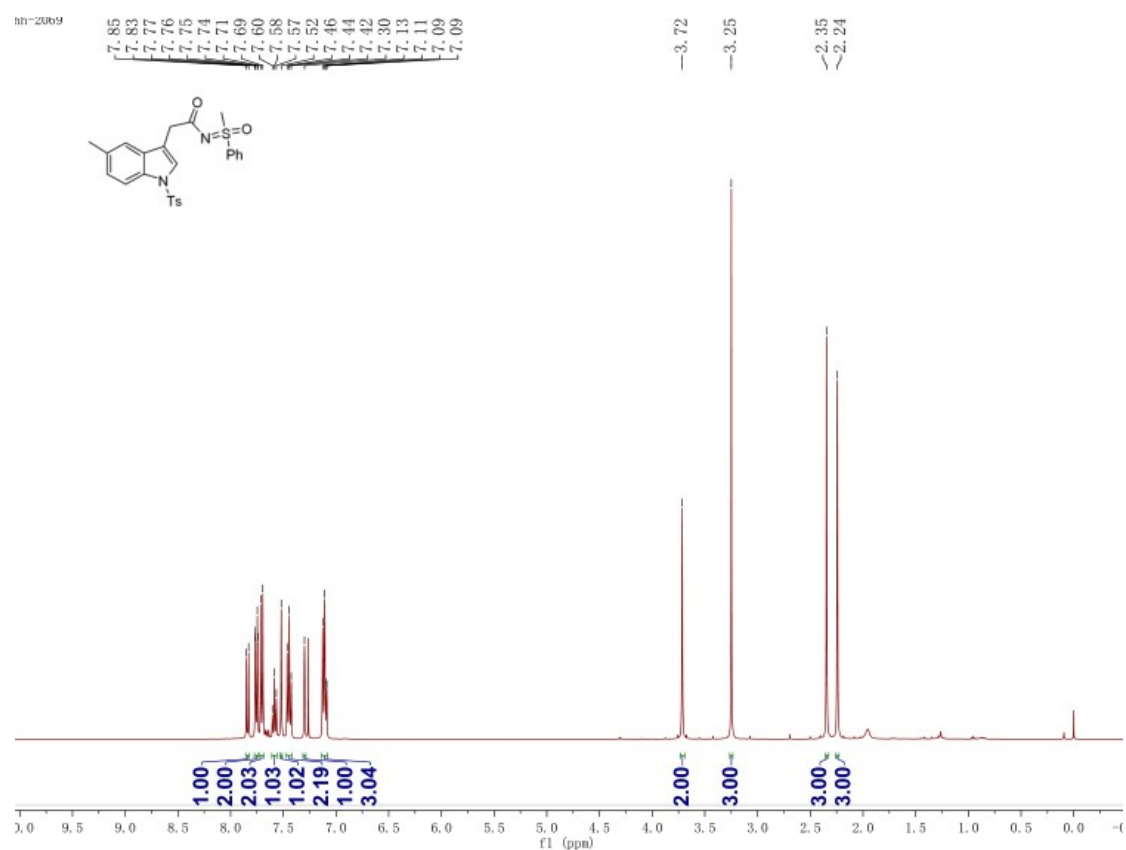

### $^{13}\text{C}$ NMR spectrum (100 MHz, $\text{CDCl}_3$ ) of 4c

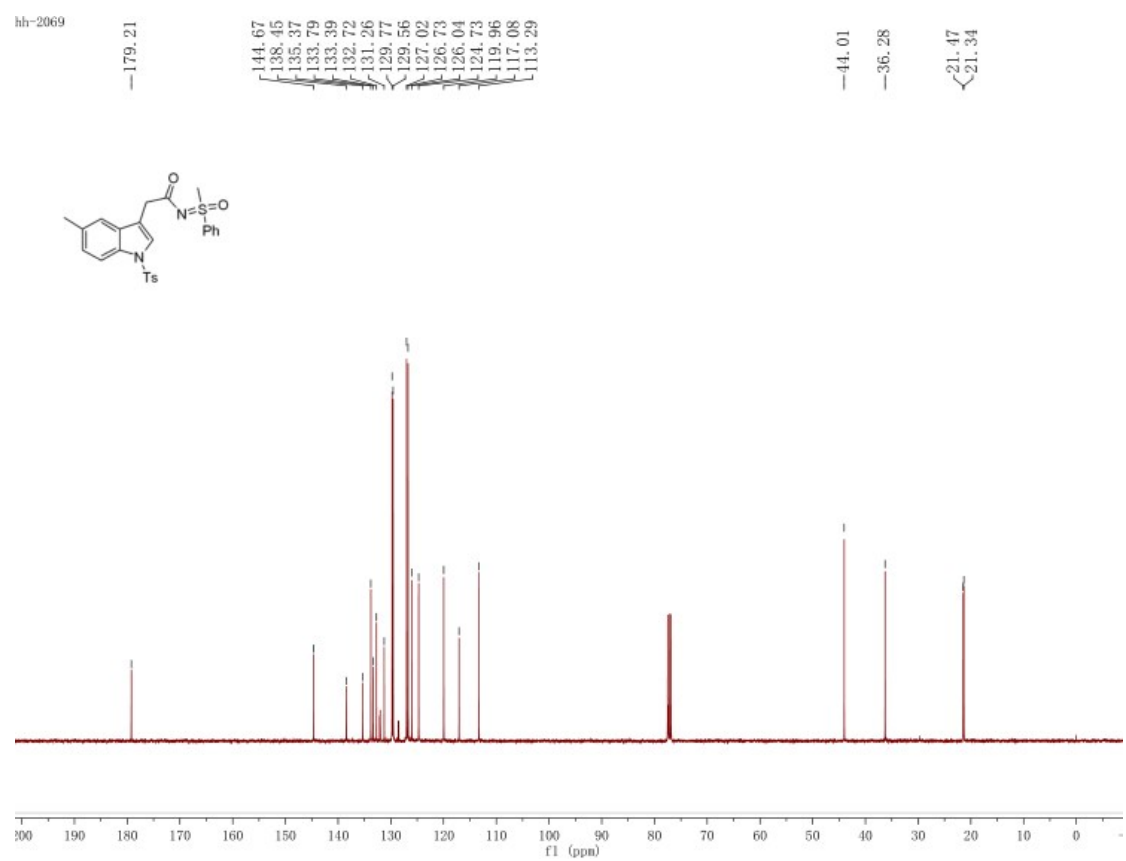

### <sup>1</sup>H NMR spectrum (400 MHz, CDCl<sub>3</sub>) of 4d

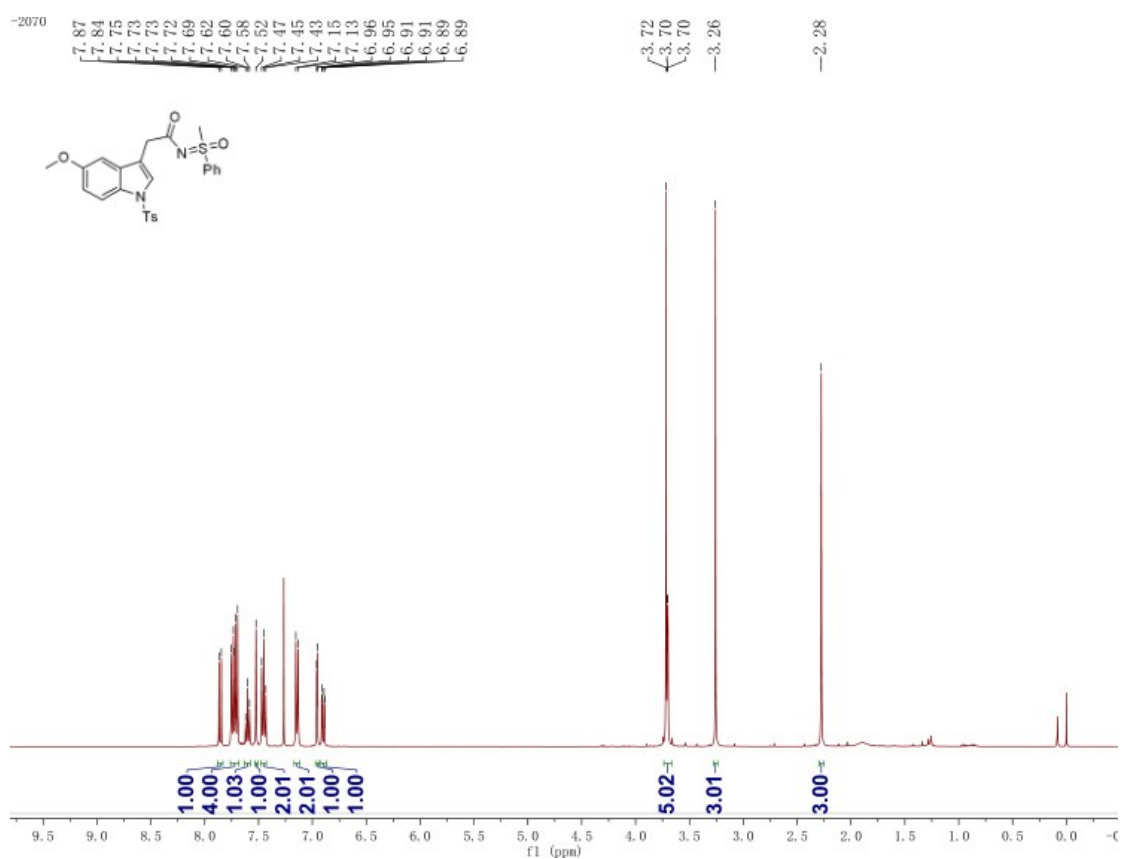

### <sup>13</sup>C NMR spectrum (100 MHz, CDCl<sub>3</sub>) of 4d

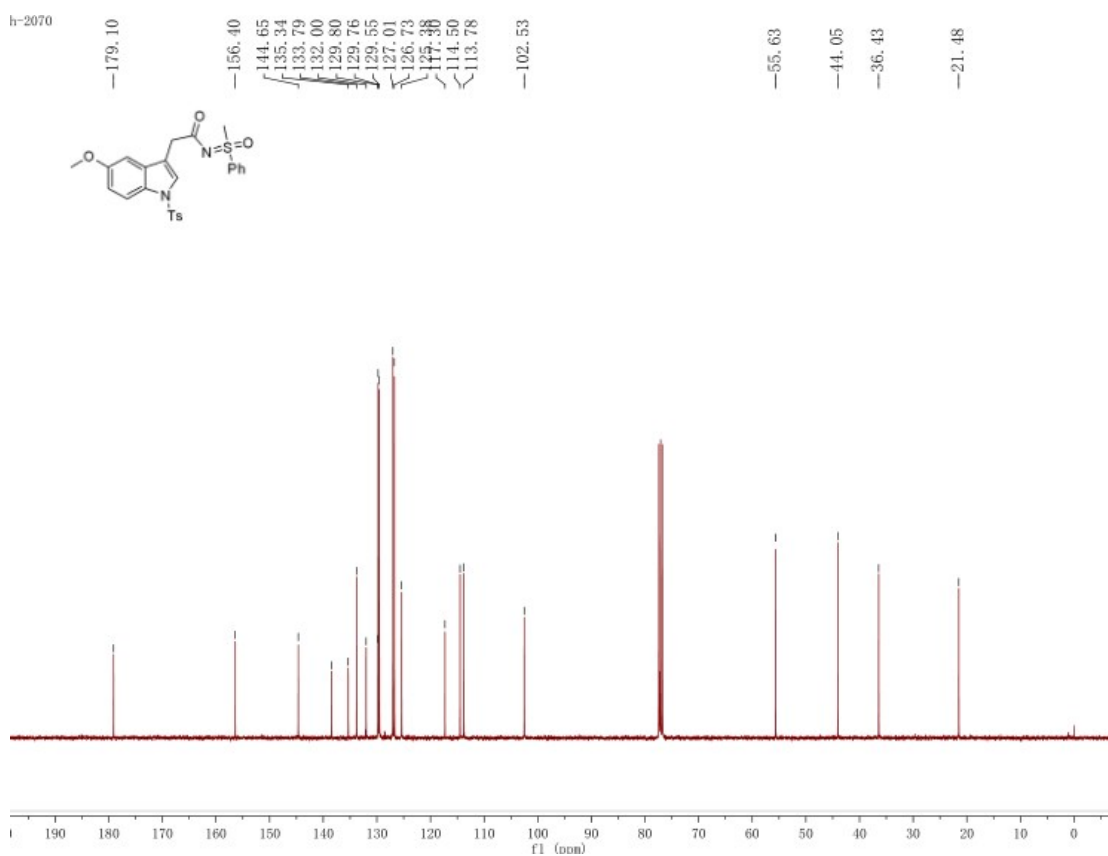

### $^1\text{H}$ NMR spectrum (400 MHz, $\text{CDCl}_3$ ) of 4e

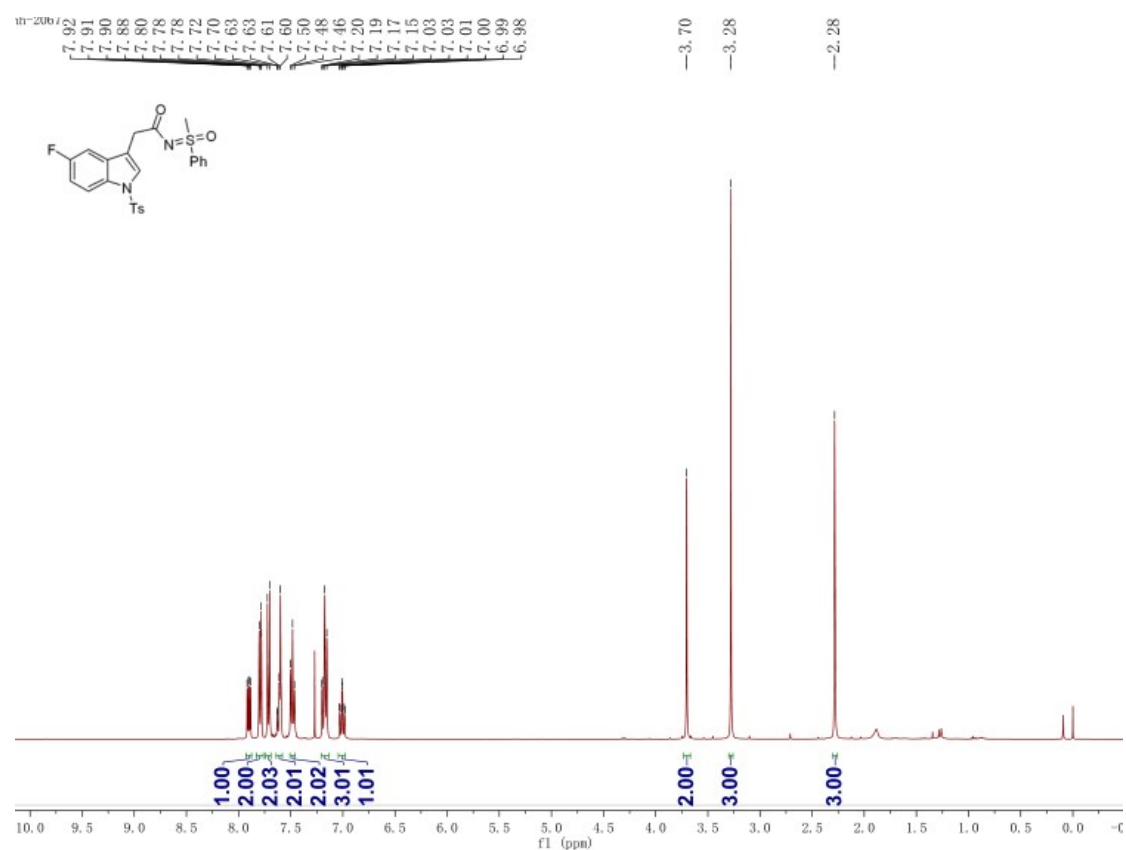

### $^{13}\text{C}$ NMR spectrum (100 MHz, $\text{CDCl}_3$ ) of 4e

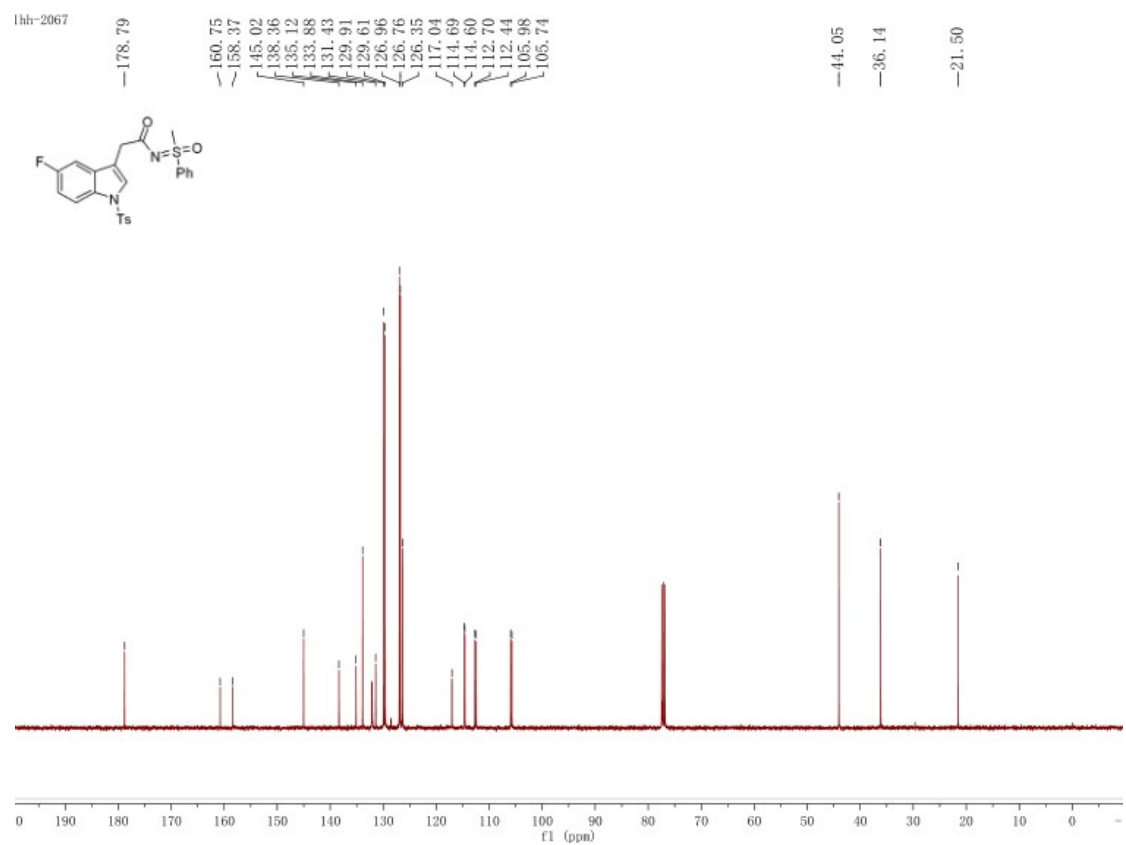

# <sup>19</sup>F NMR (376 MHz, CDCl<sub>3</sub>) of 4e

hh-2067f

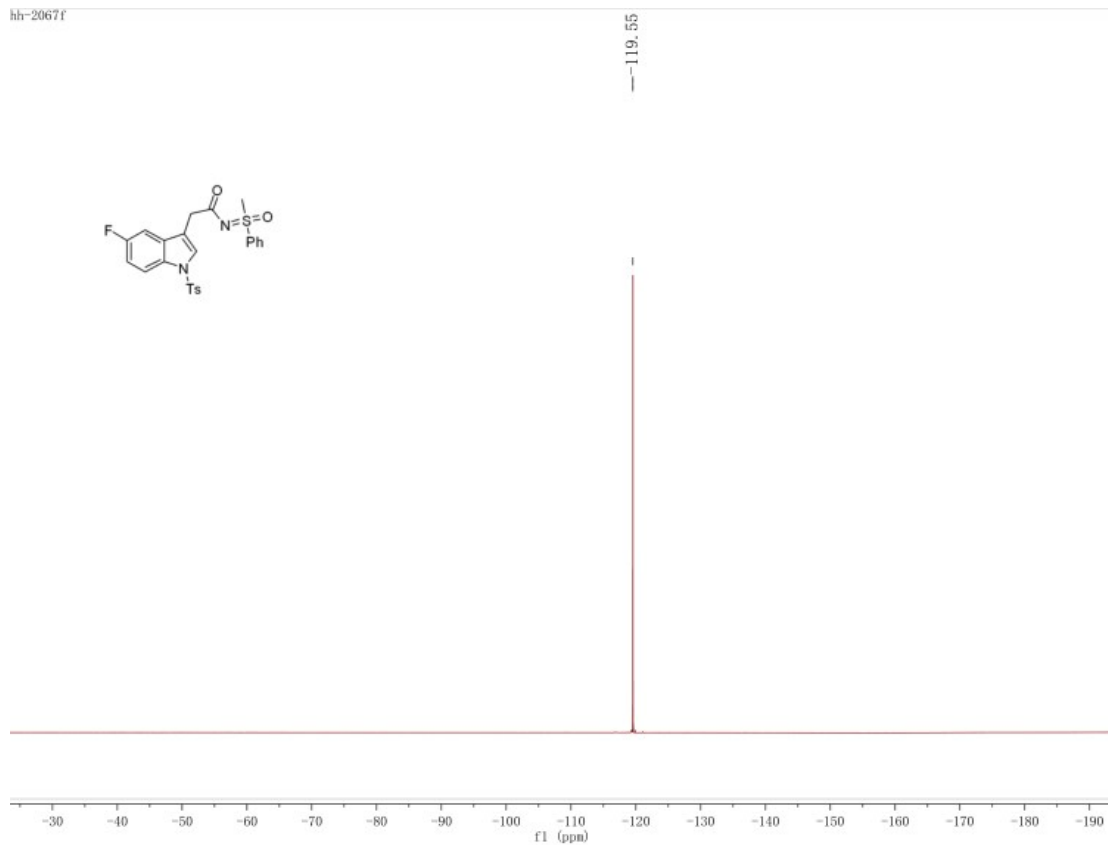



### $^1\text{H}$ NMR spectrum (400 MHz, $\text{CDCl}_3$ ) of 4f

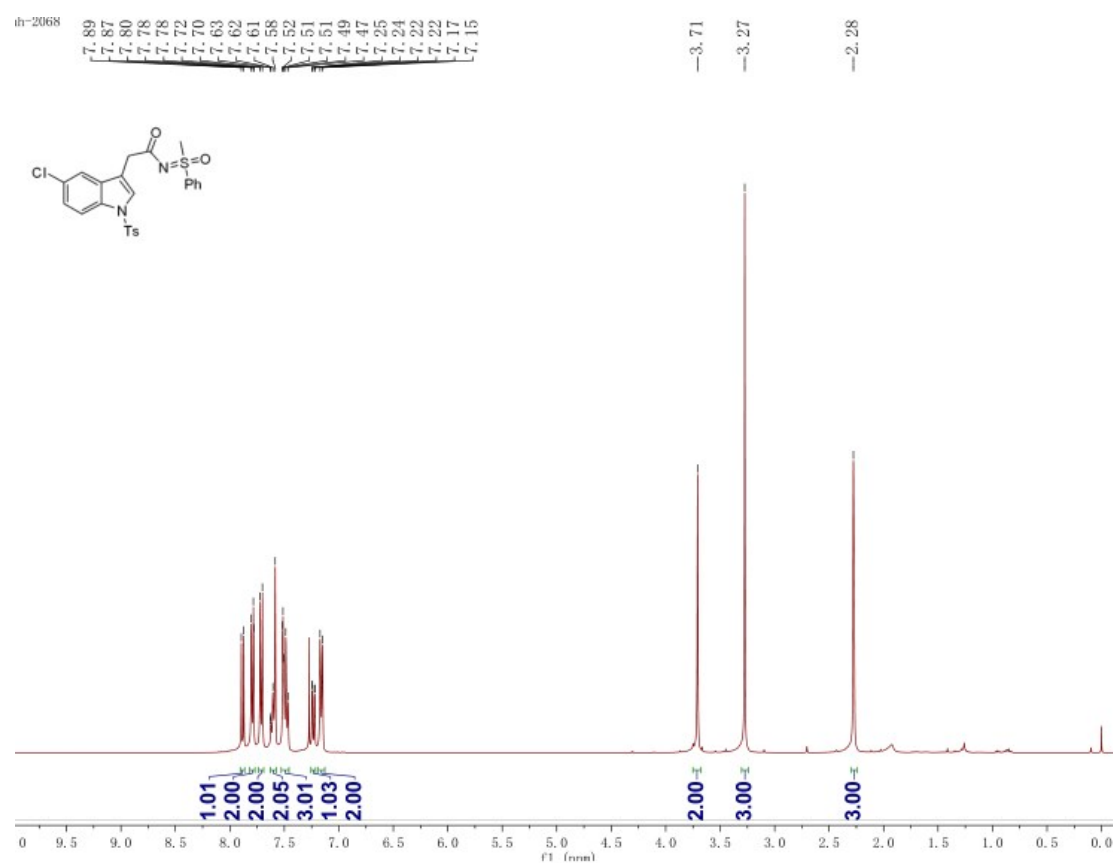

### $^{13}\text{C}$ NMR spectrum (100 MHz, $\text{CDCl}_3$ ) of 4f

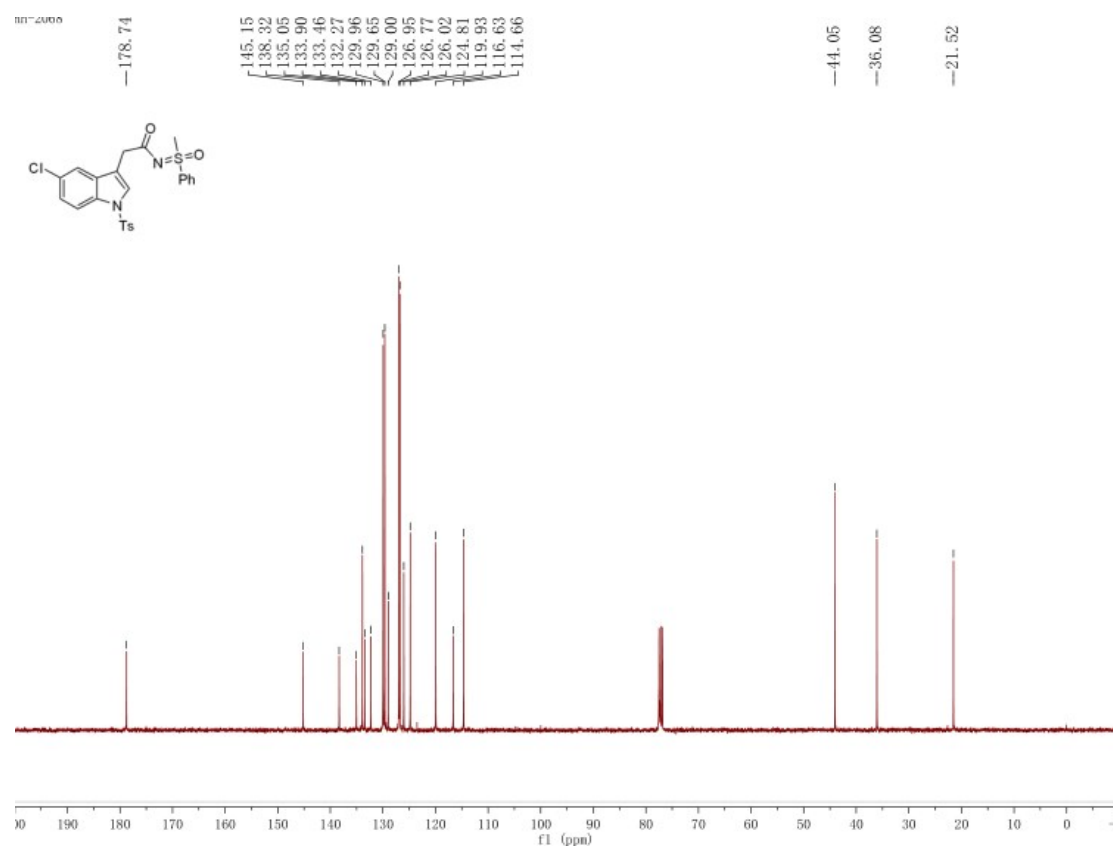

### <sup>1</sup>H NMR spectrum (400 MHz, CDCl<sub>3</sub>) of 4g

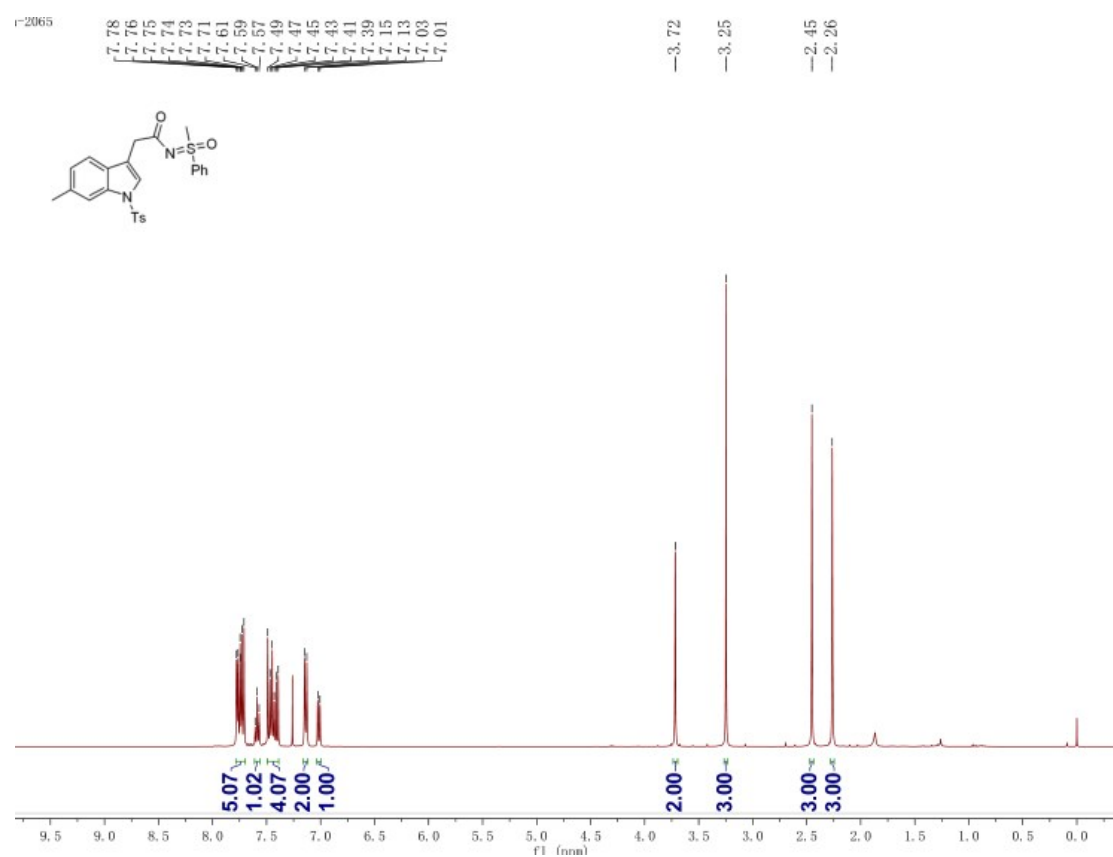

### <sup>13</sup>C NMR spectrum (100 MHz, CDCl<sub>3</sub>) of 4g

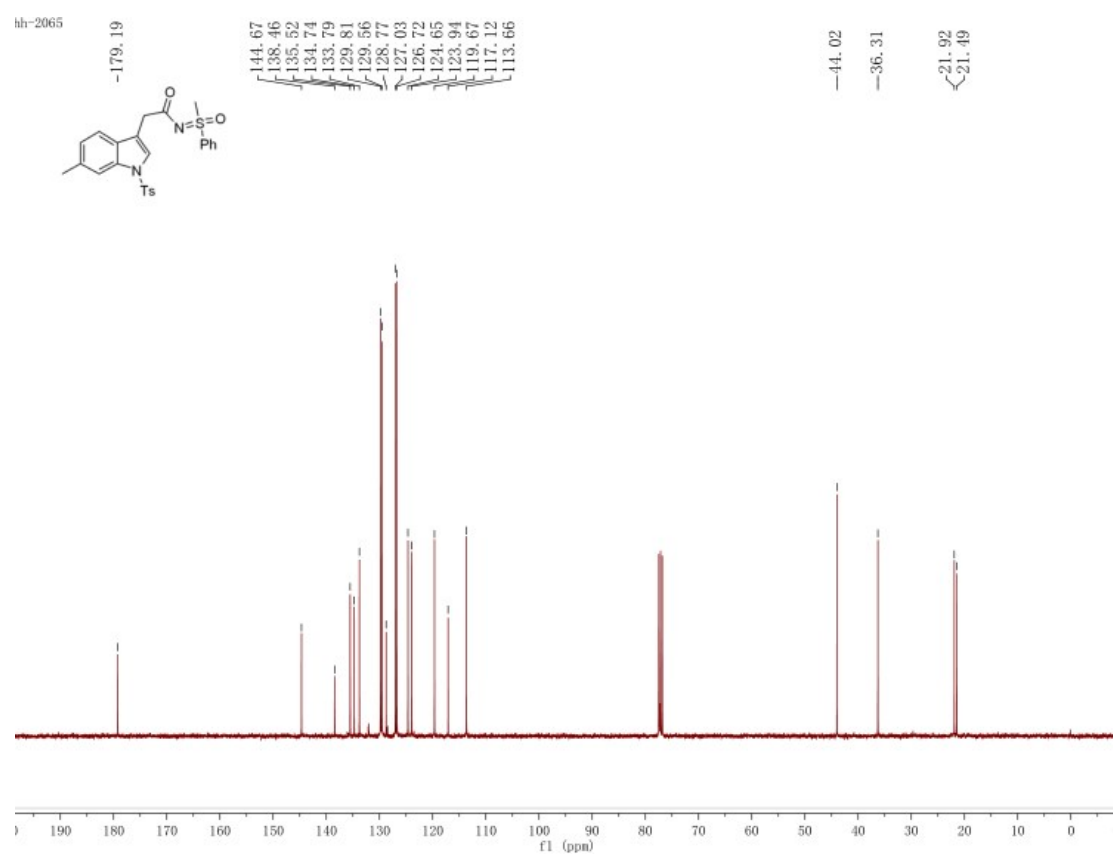



**<sup>19</sup>F NMR (376 MHz, CDCl<sub>3</sub>) of 4h**

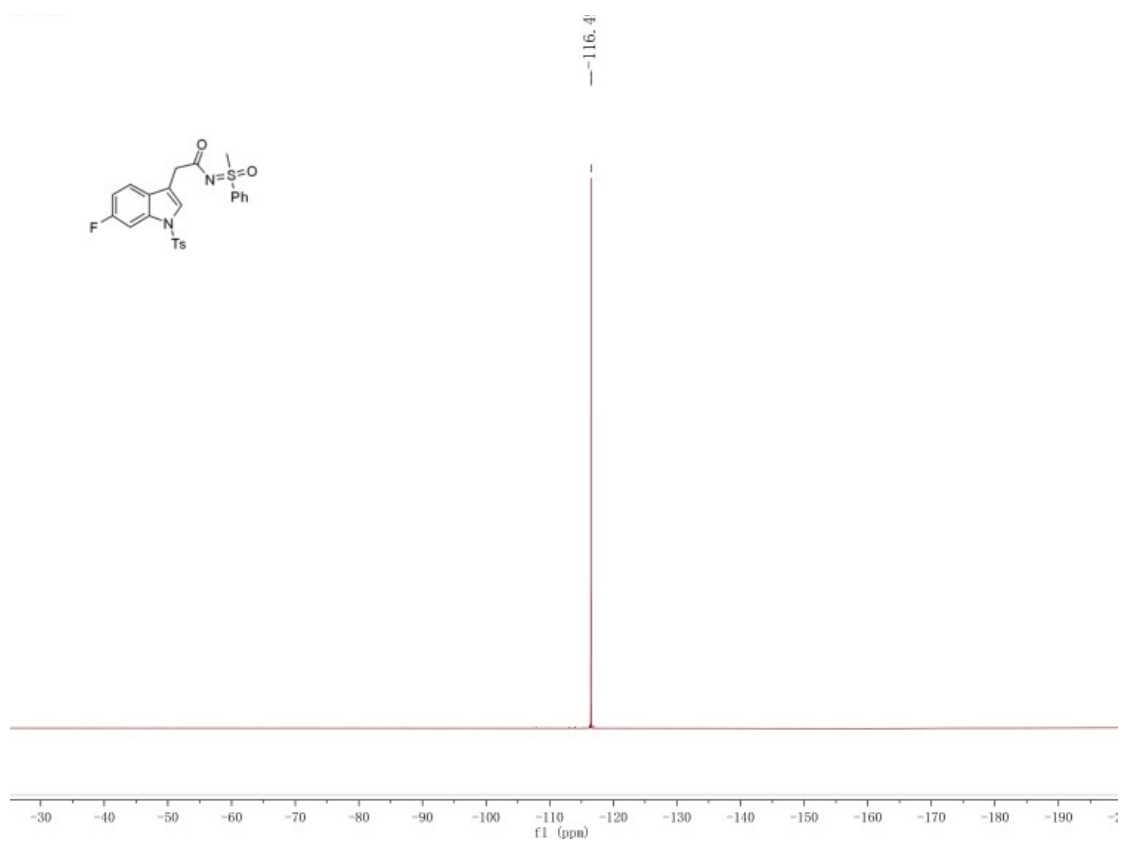

### <sup>1</sup>H NMR spectrum (400 MHz, CDCl<sub>3</sub>) of 4i

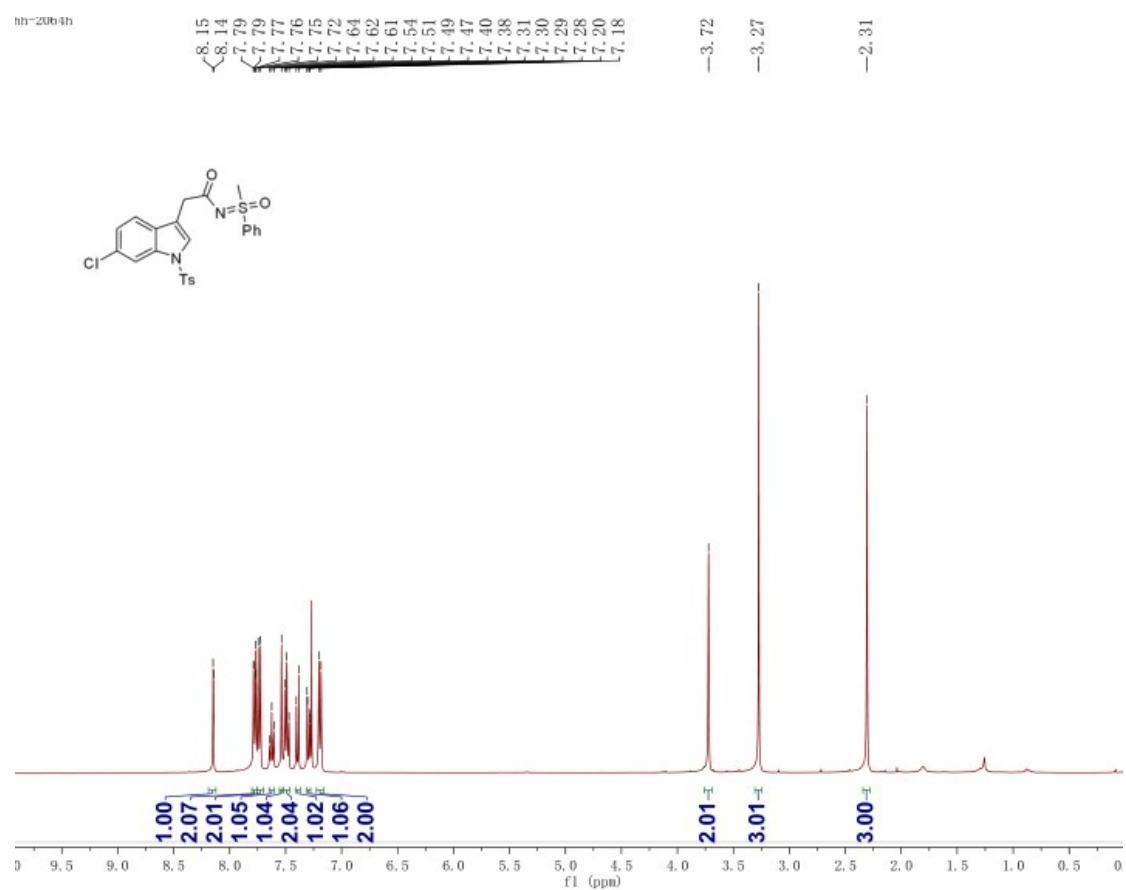

### <sup>13</sup>C NMR spectrum (100 MHz, CDCl<sub>3</sub>) of 4i

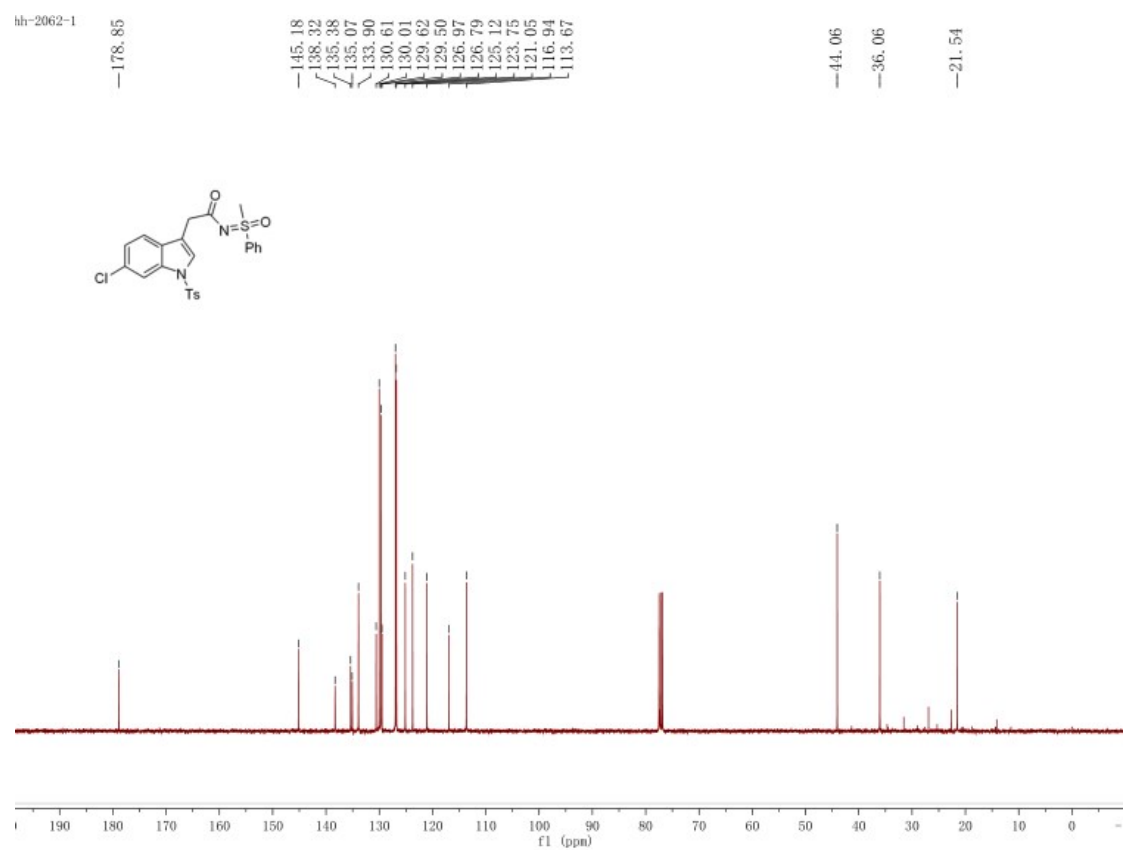

### $^1\text{H}$ NMR spectrum (400 MHz, $\text{CDCl}_3$ ) of 4j

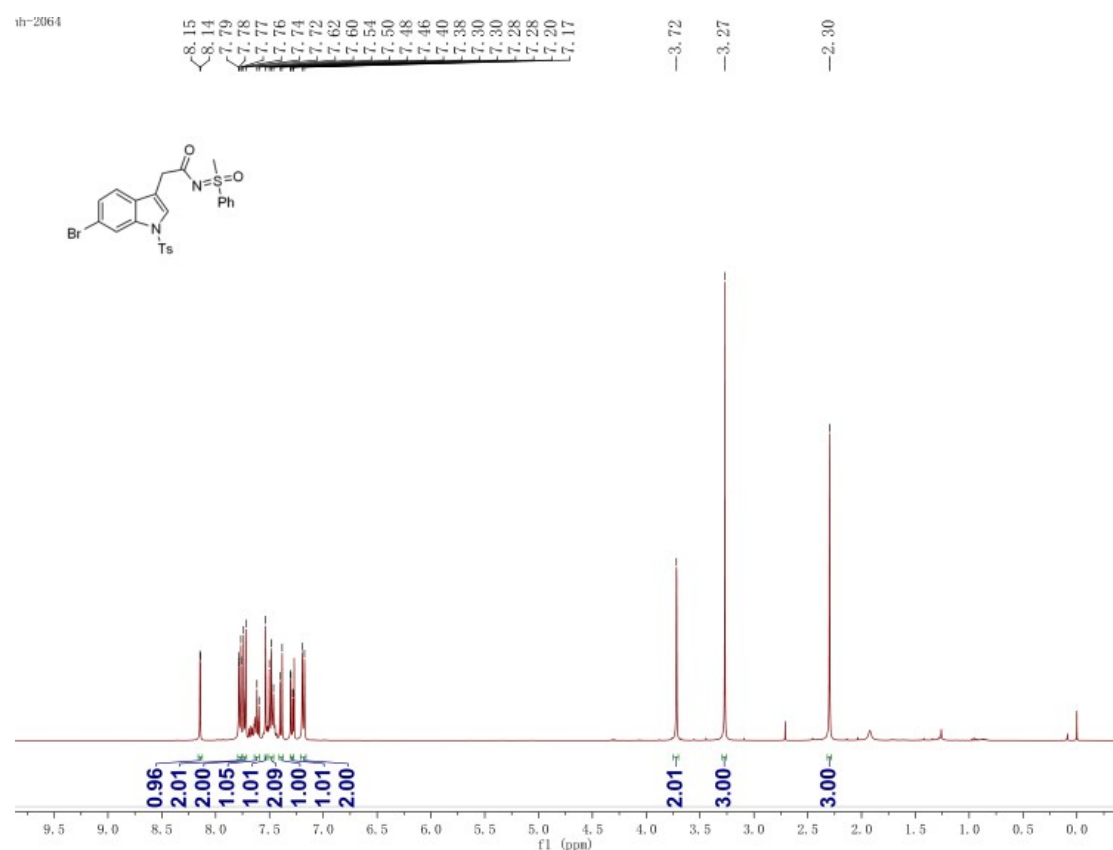

### $^{13}\text{C}$ NMR spectrum (100 MHz, $\text{CDCl}_3$ ) of 4j

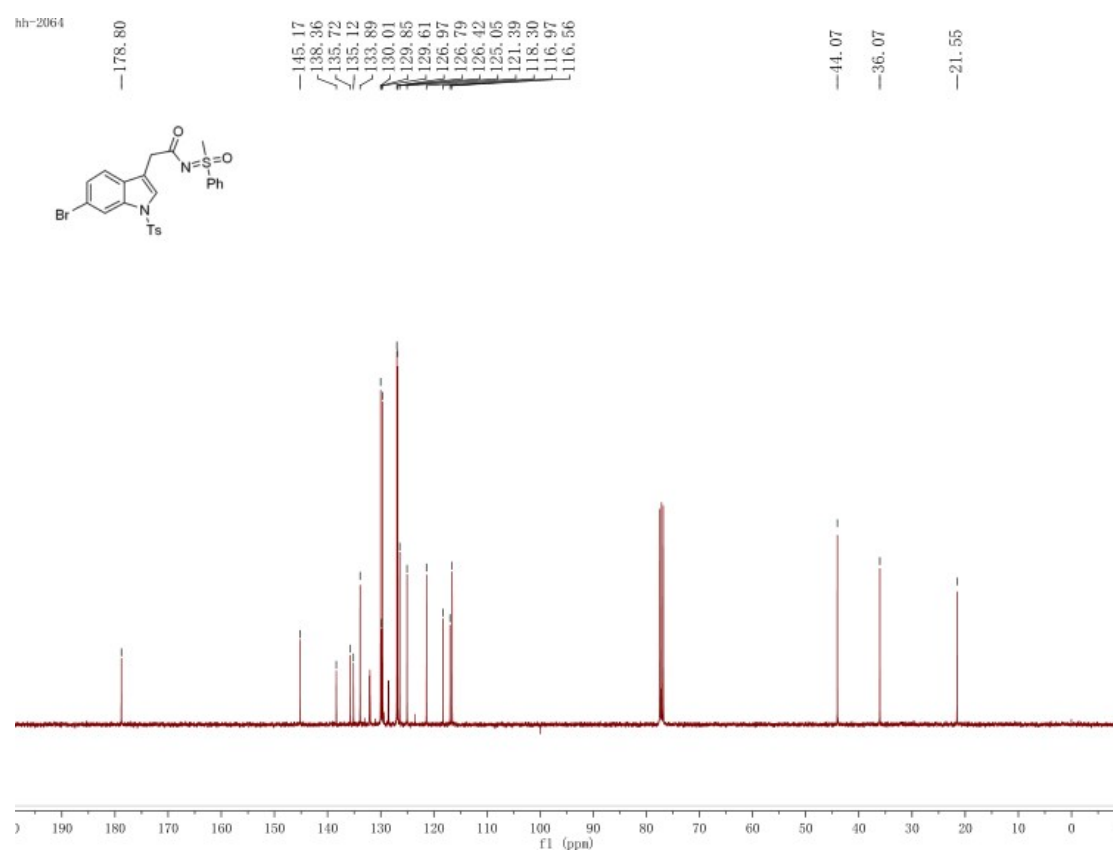

### <sup>1</sup>H NMR spectrum (400 MHz, CDCl<sub>3</sub>) of 4k

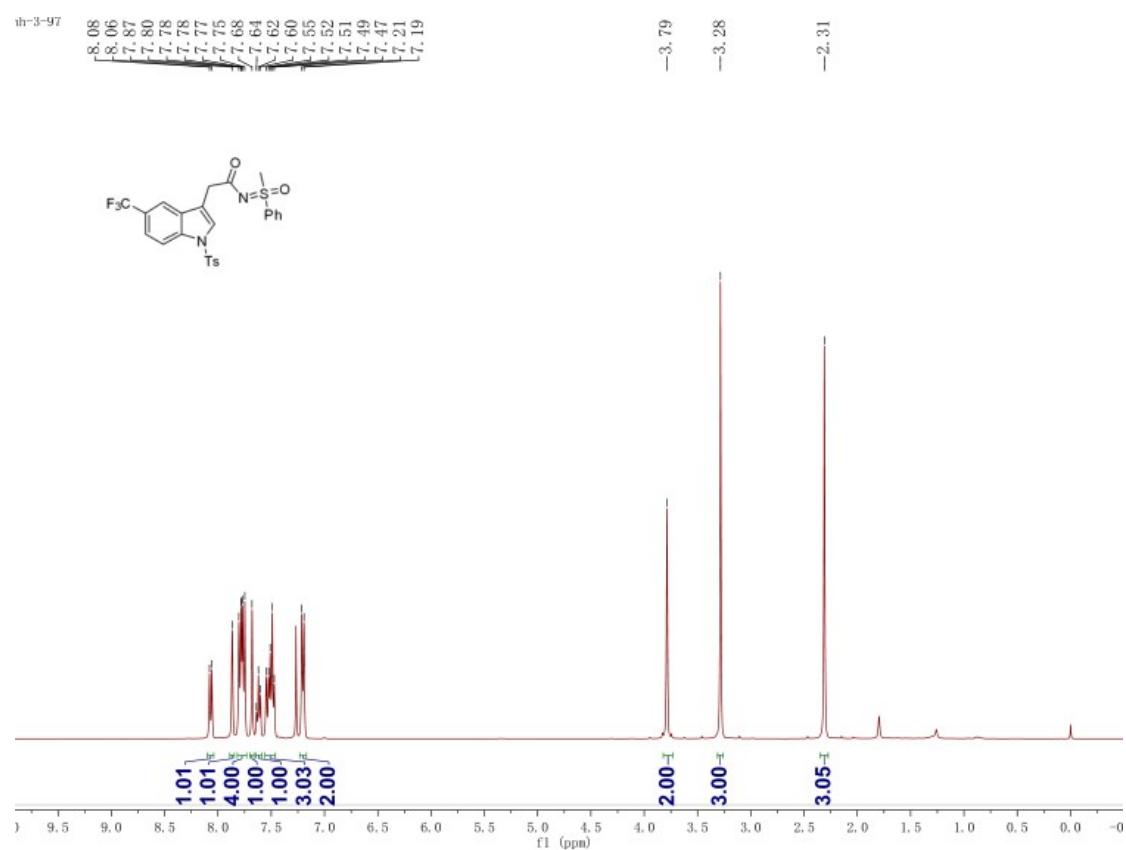

### <sup>13</sup>C NMR spectrum (100 MHz, CDCl<sub>3</sub>) of 4k

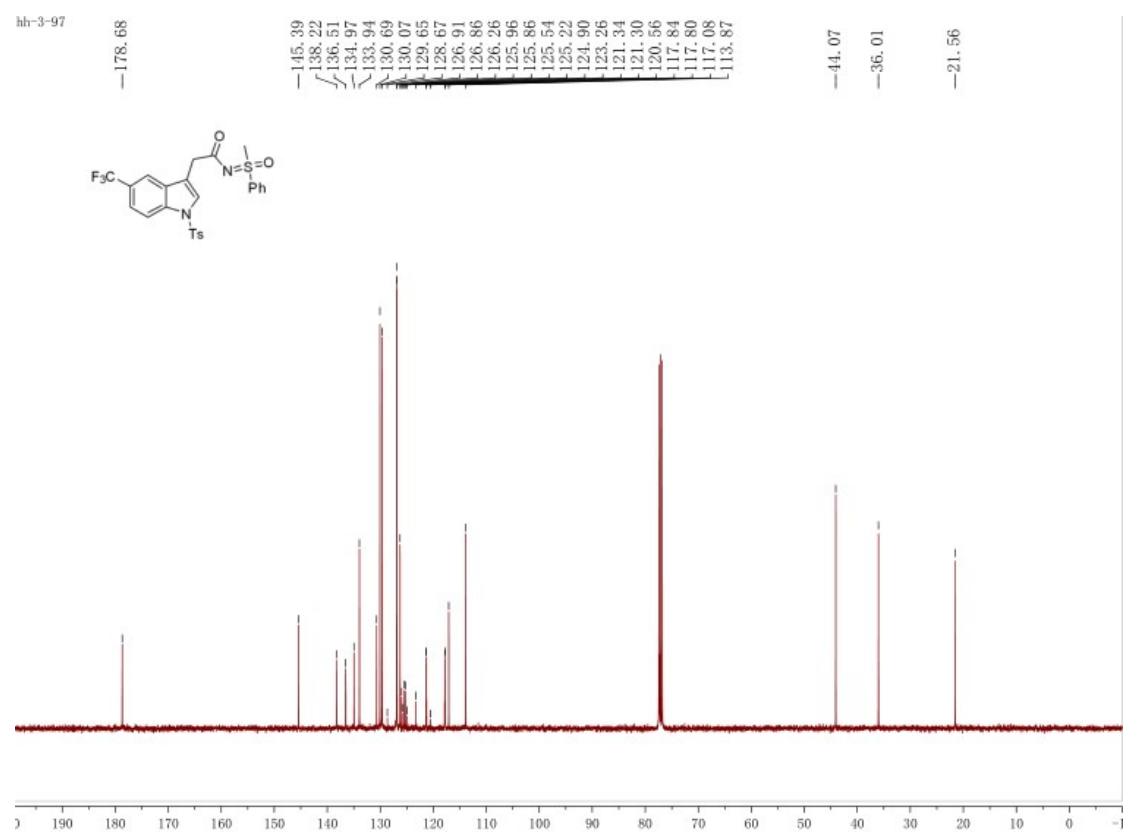

# <sup>19</sup>F NMR (376 MHz, CDCl<sub>3</sub>) of 4k

hh-3-94

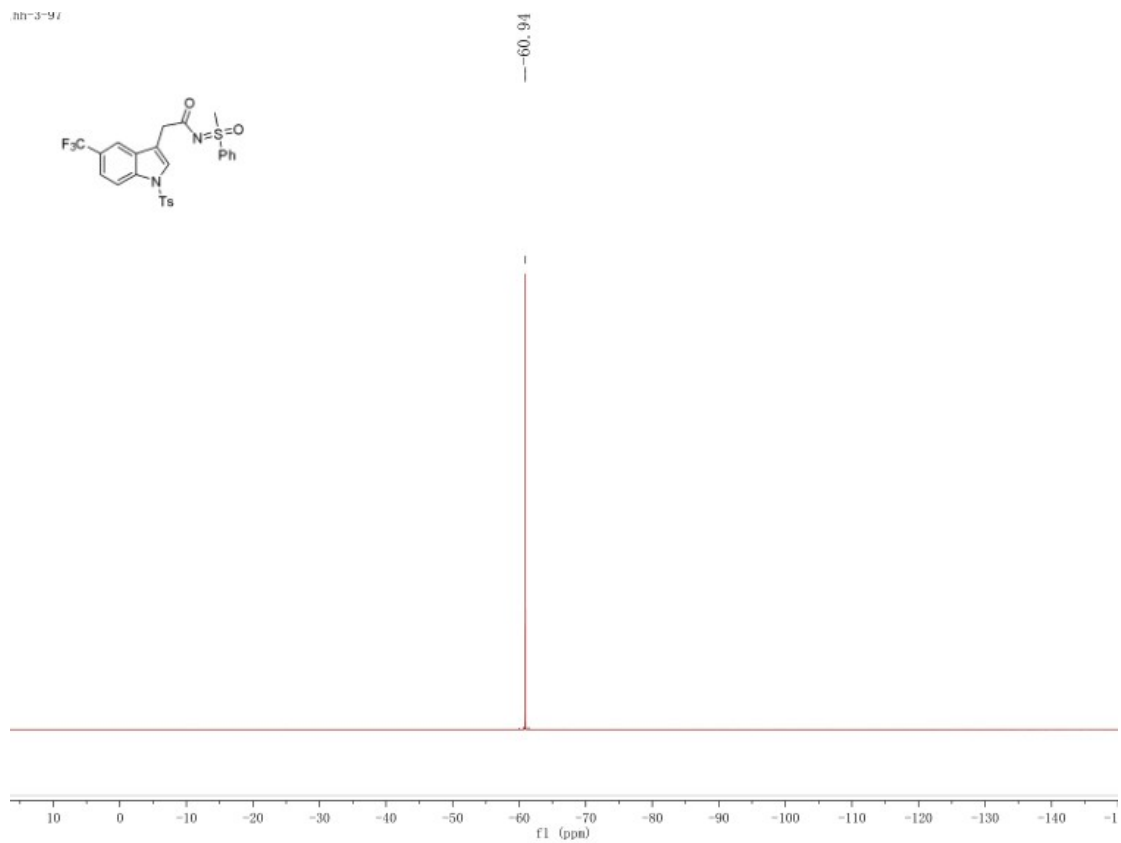



### <sup>1</sup>H NMR spectrum (400 MHz, CDCl<sub>3</sub>) of 4l

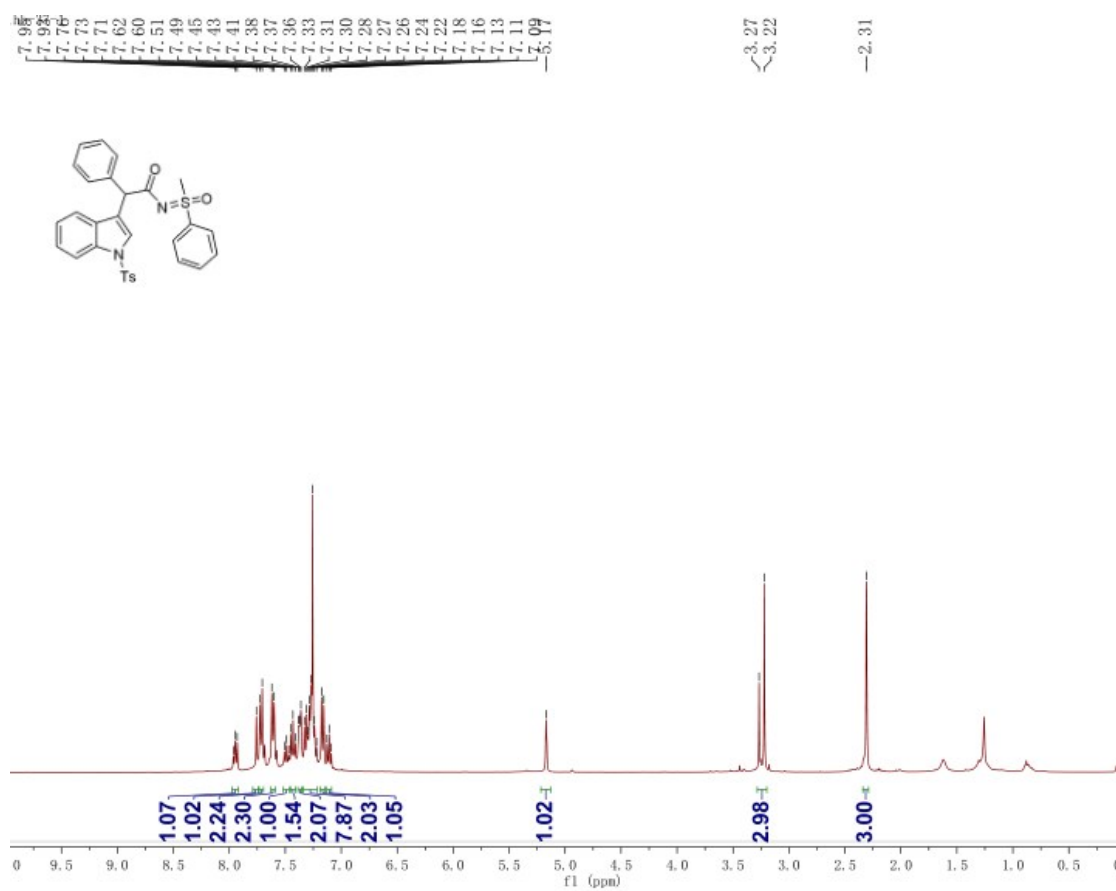

### <sup>13</sup>C NMR spectrum (100 MHz, CDCl<sub>3</sub>) of 4l

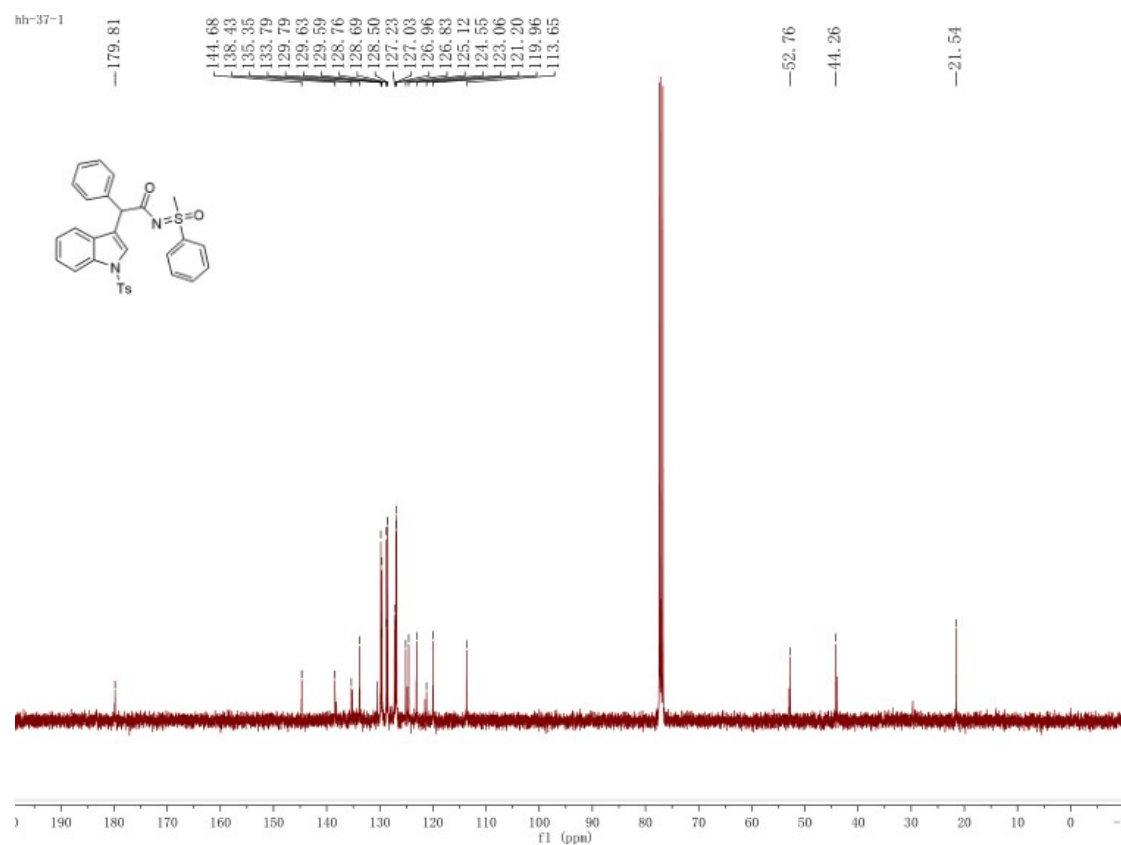

### <sup>1</sup>H NMR spectrum (400 MHz, CDCl<sub>3</sub>) of 4m

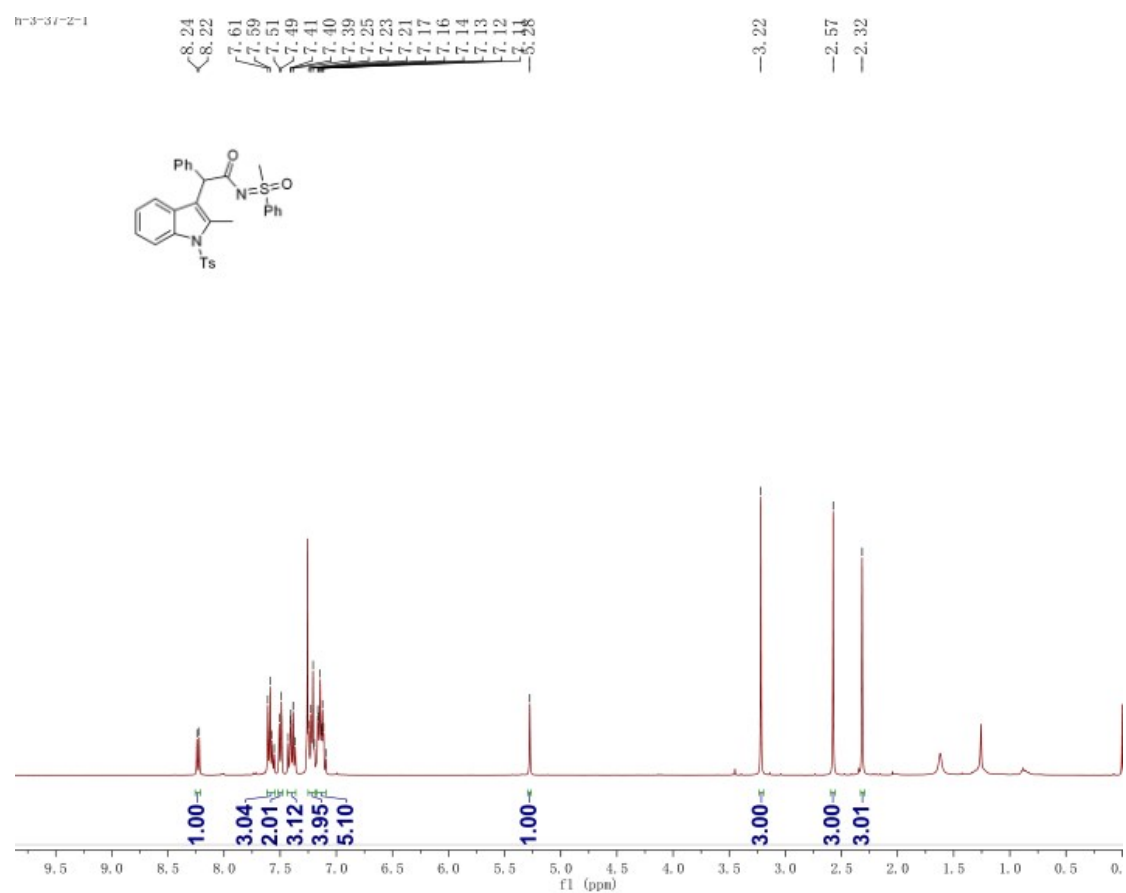

### <sup>13</sup>C NMR spectrum (100 MHz, CDCl<sub>3</sub>) of 4m

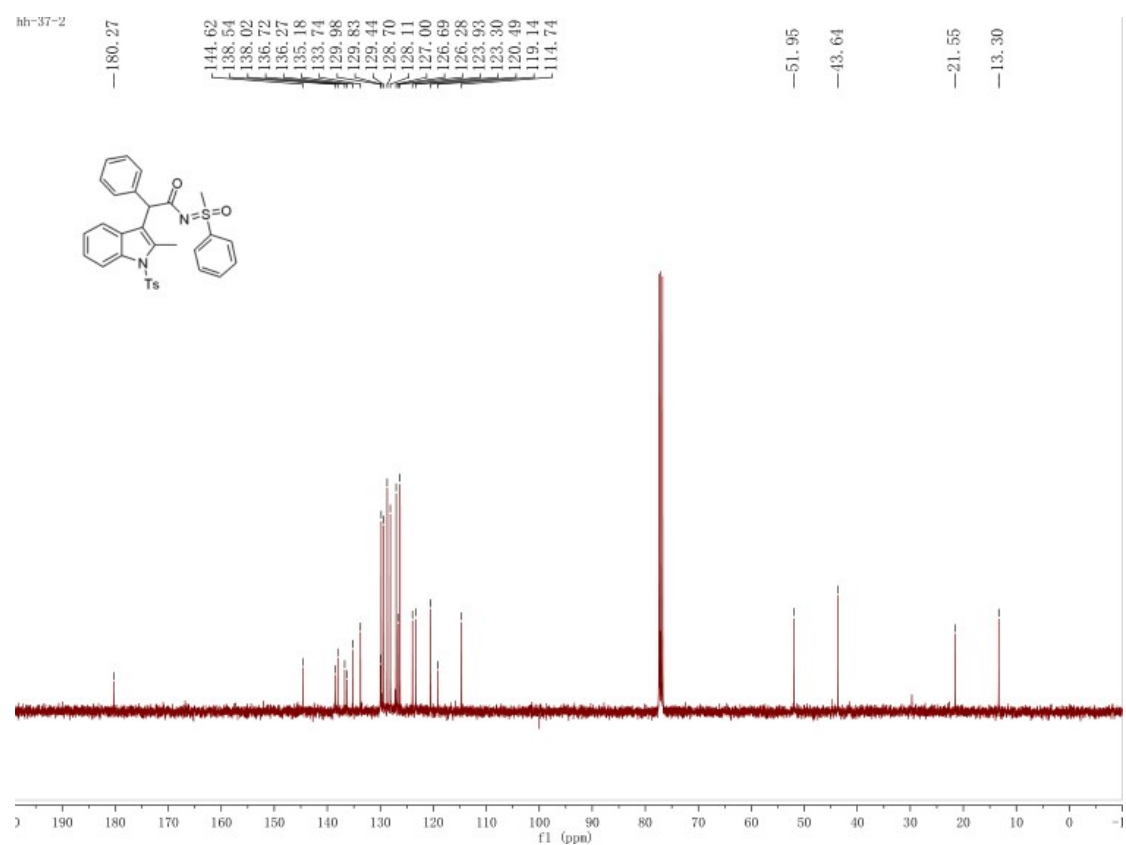

### $^1\text{H}$ NMR spectrum (400 MHz, $\text{CDCl}_3$ ) of 4n

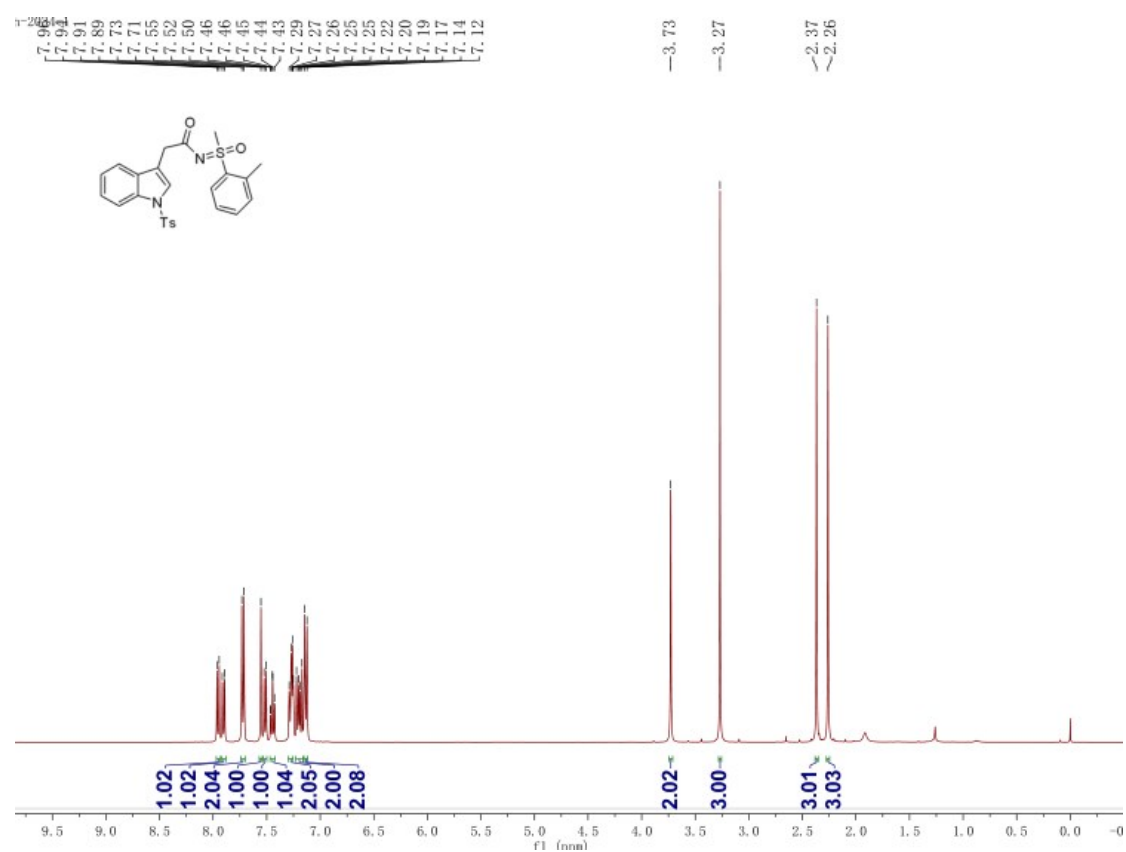

### $^{13}\text{C}$ NMR spectrum (100 MHz, $\text{CDCl}_3$ ) of 4n

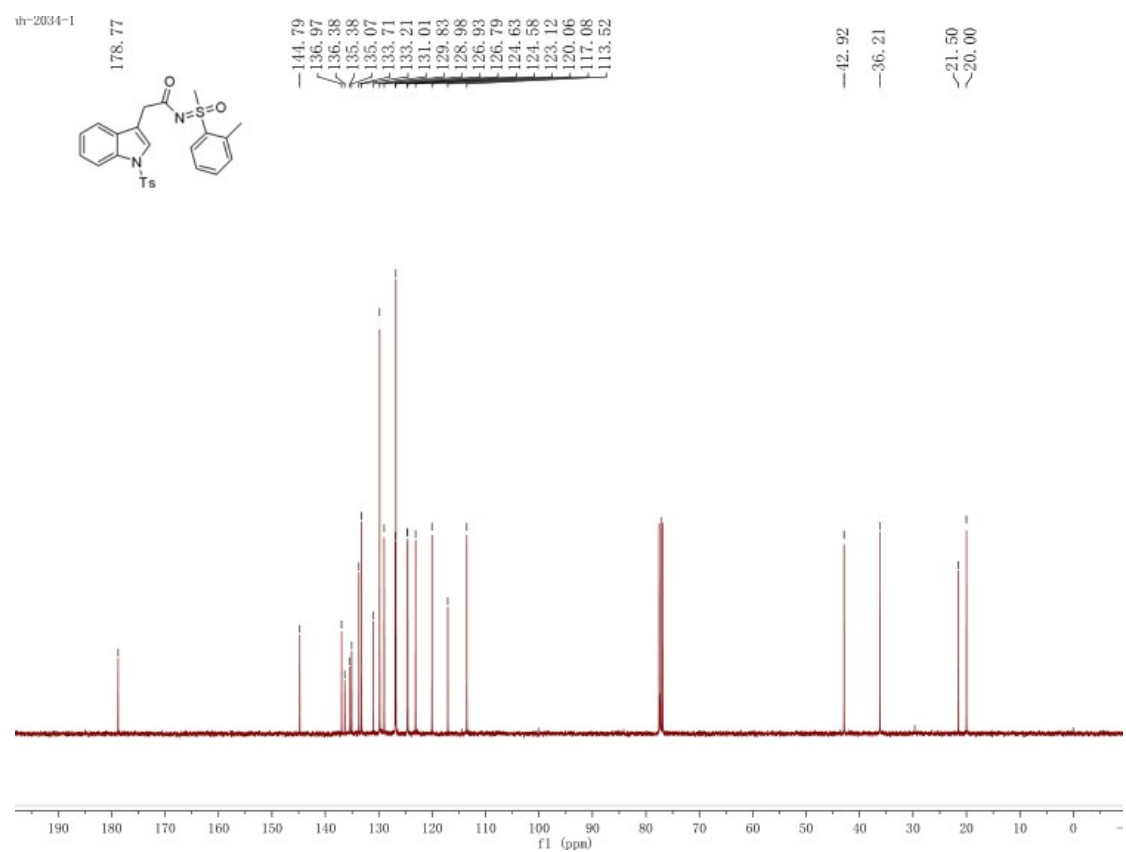

### <sup>1</sup>H NMR spectrum (400 MHz, CDCl<sub>3</sub>) of 4o

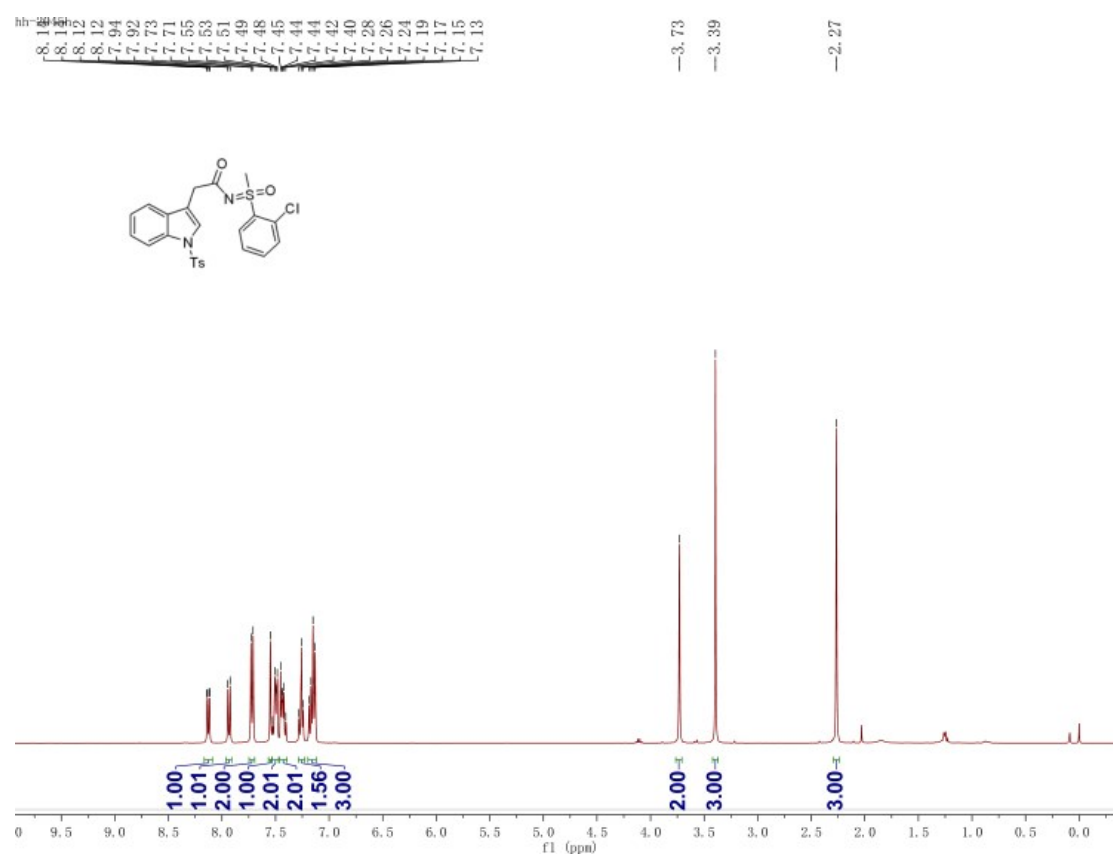

### <sup>13</sup>C NMR spectrum (100 MHz, CDCl<sub>3</sub>) of 4o

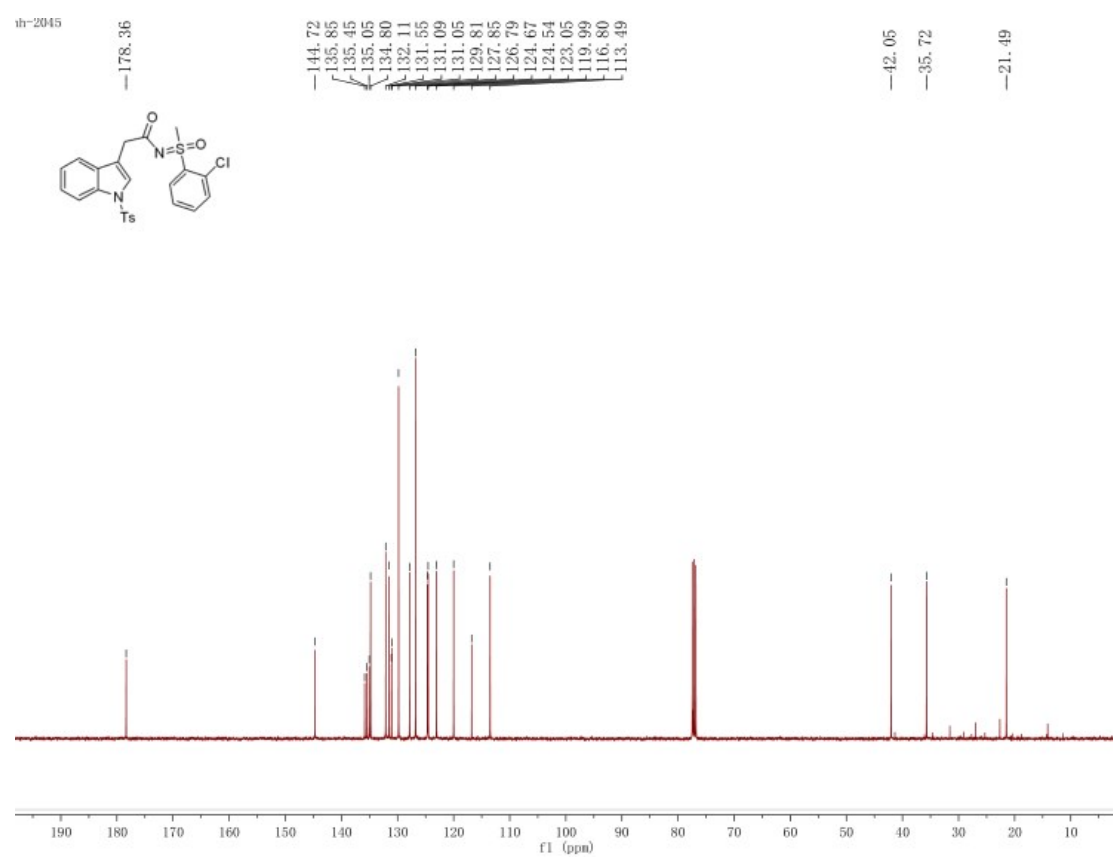

### <sup>1</sup>H NMR spectrum (400 MHz, CDCl<sub>3</sub>) of 4p

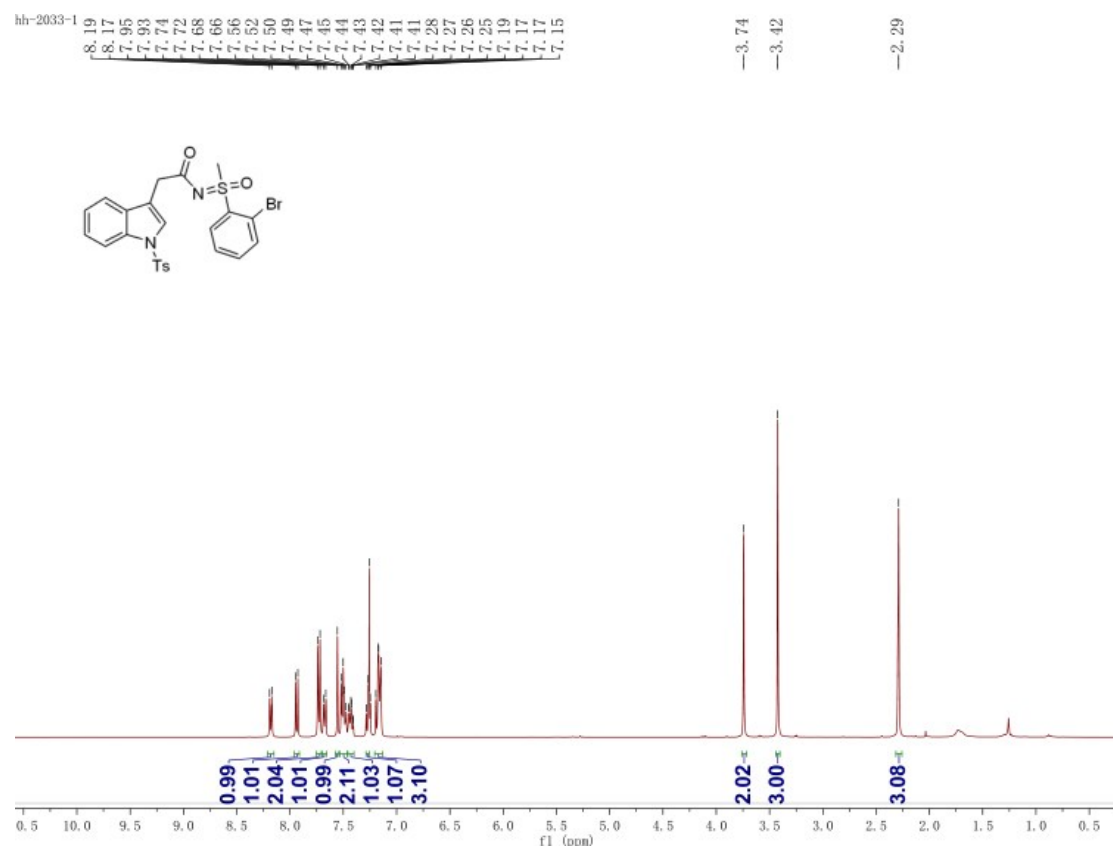

### <sup>13</sup>C NMR spectrum (100 MHz, CDCl<sub>3</sub>) of 4p

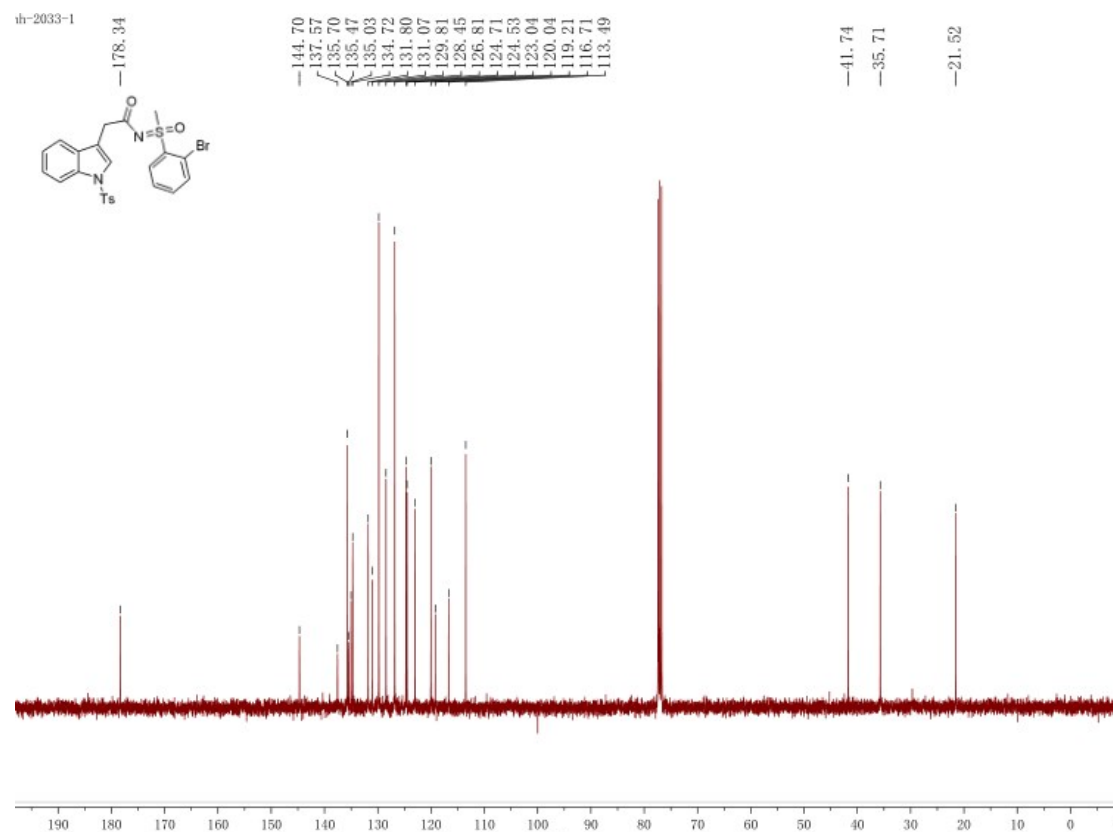

### <sup>1</sup>H NMR spectrum (400 MHz, CDCl<sub>3</sub>) of 4q

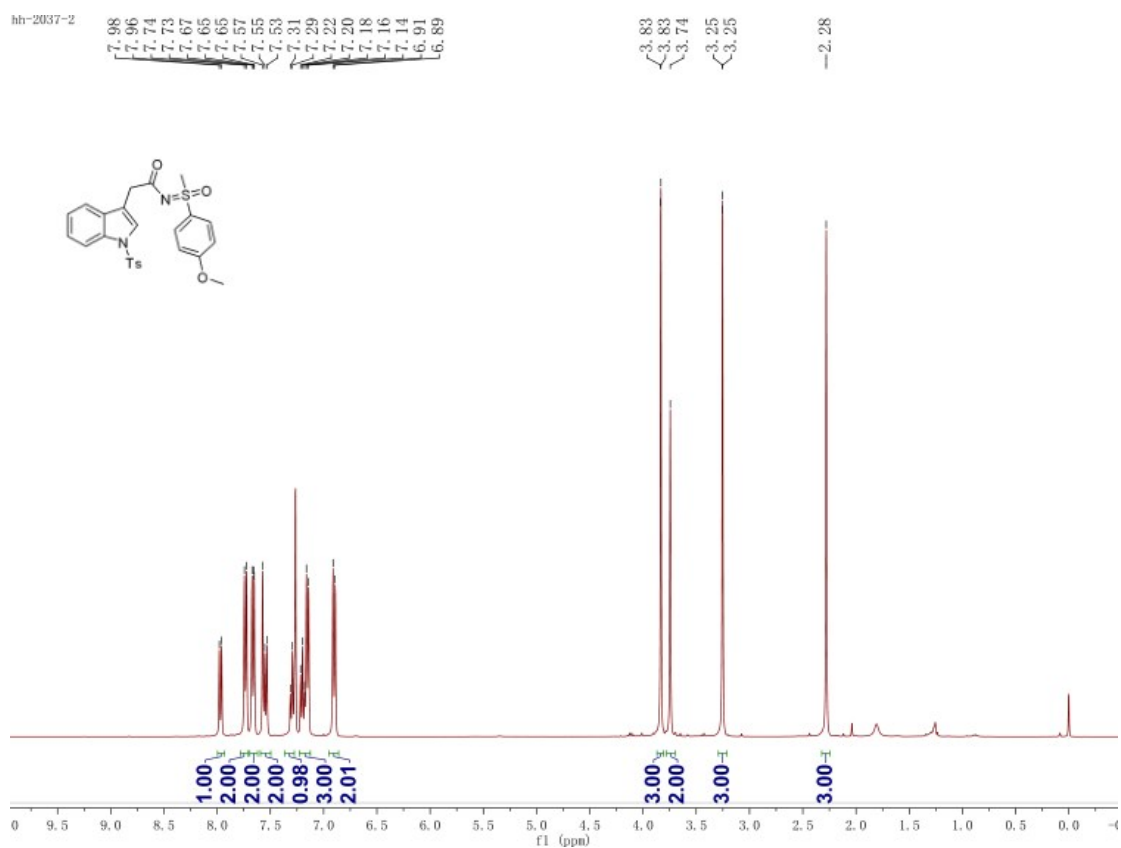

### <sup>13</sup>C NMR spectrum (100 MHz, CDCl<sub>3</sub>) of 4q

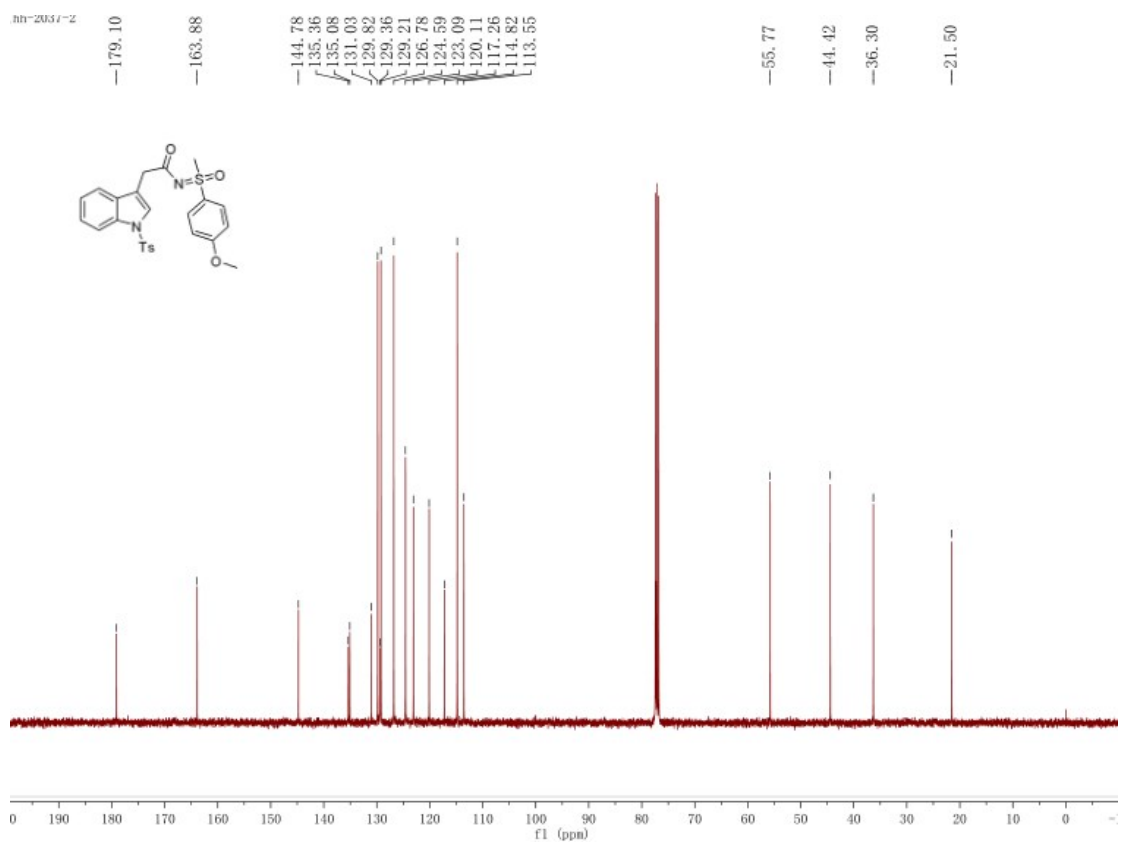

### <sup>1</sup>H NMR spectrum (400 MHz, CDCl<sub>3</sub>) of 4r

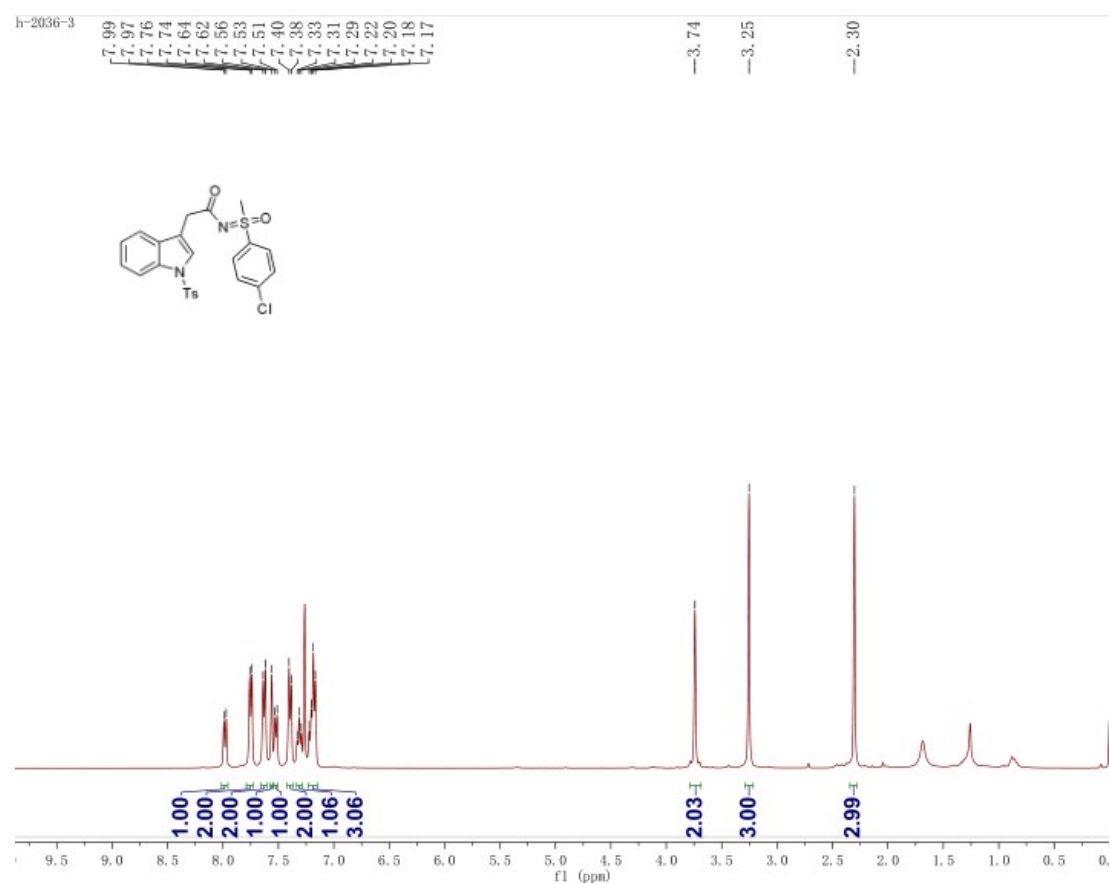

### <sup>13</sup>C NMR spectrum (100 MHz, CDCl<sub>3</sub>) of 4r

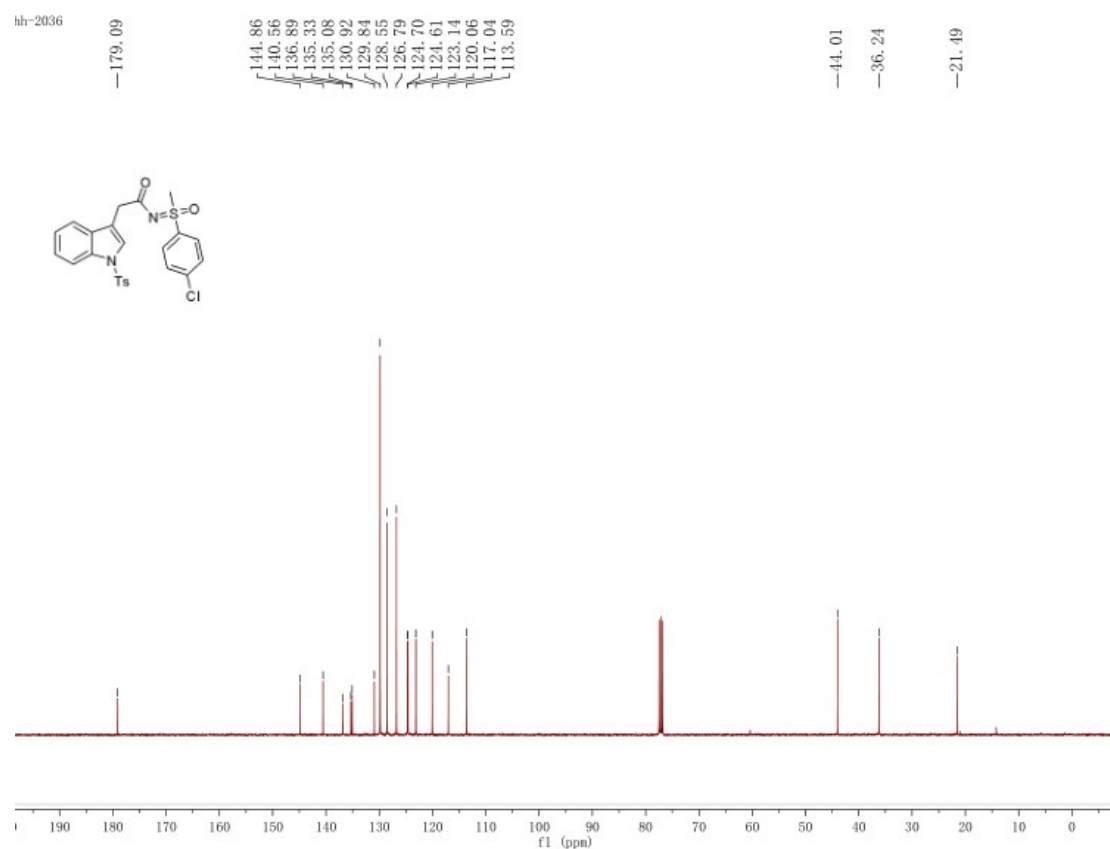

### $^1\text{H}$ NMR spectrum (400 MHz, $\text{CDCl}_3$ ) of 4s

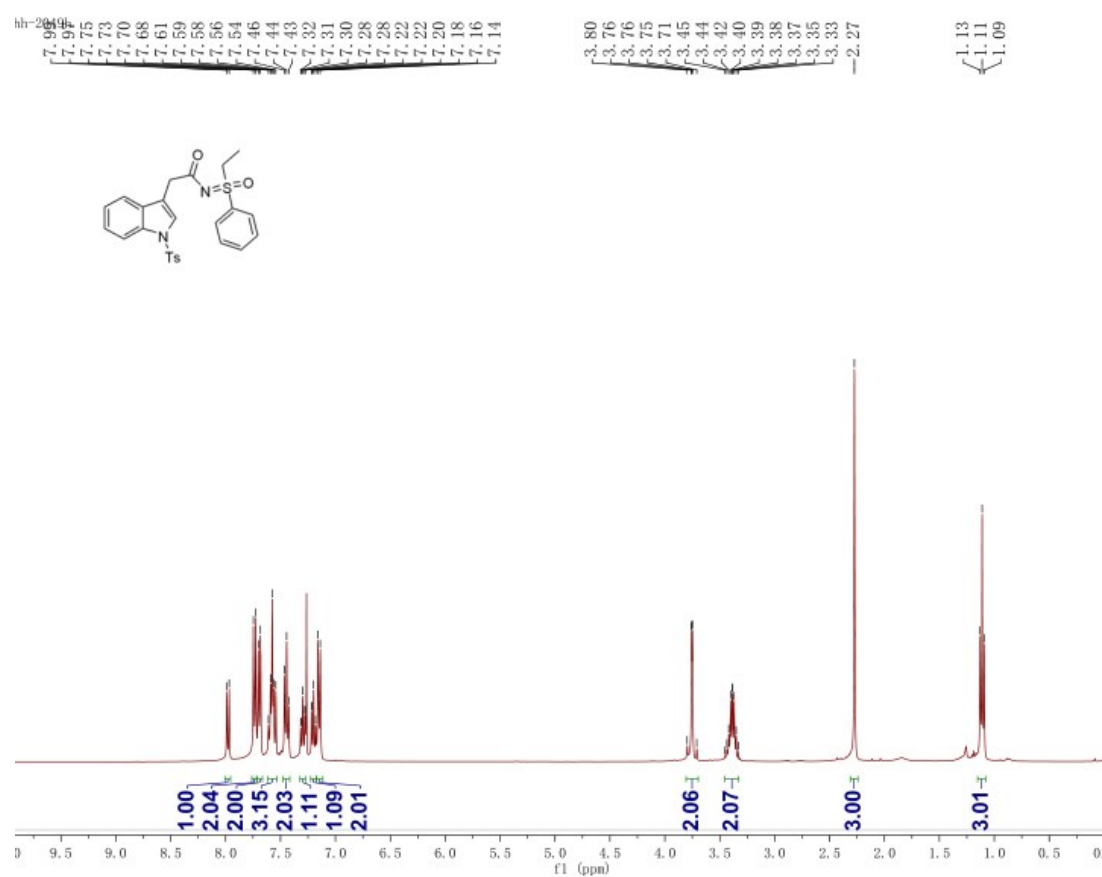

### $^{13}\text{C}$ NMR spectrum (100 MHz, $\text{CDCl}_3$ ) of 4s

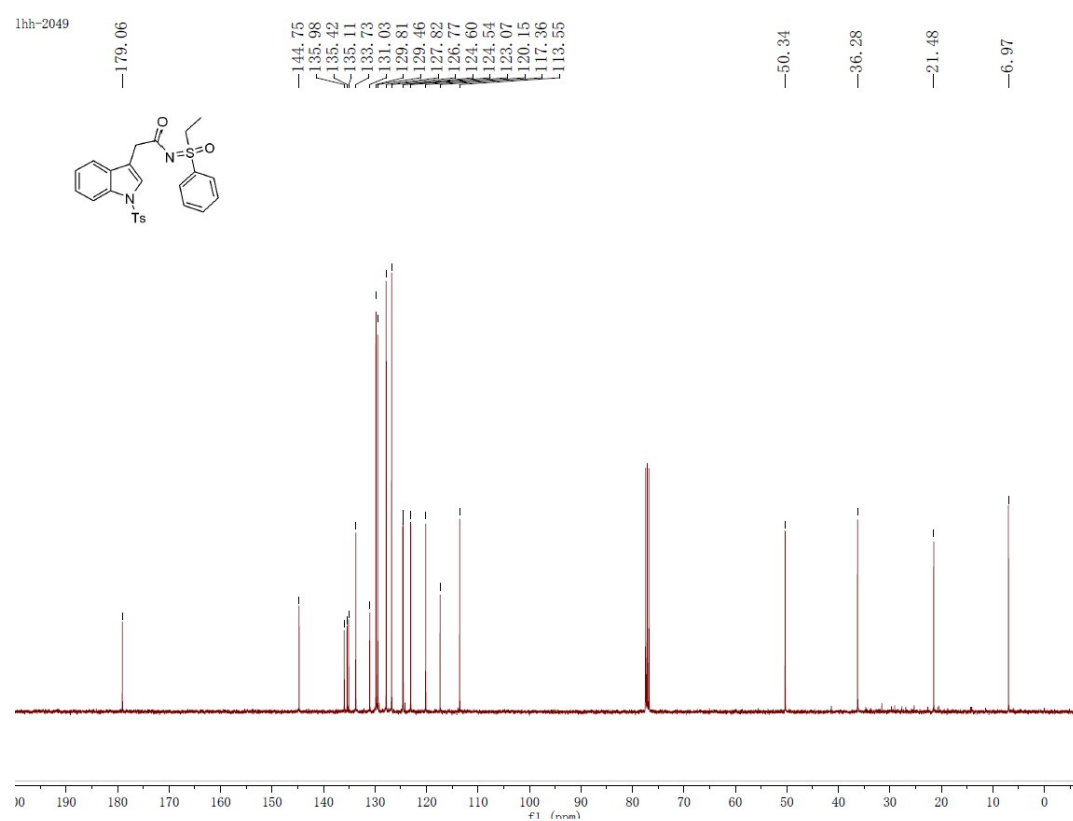



### <sup>1</sup>H NMR spectrum (400 MHz, CDCl<sub>3</sub>) of 4t

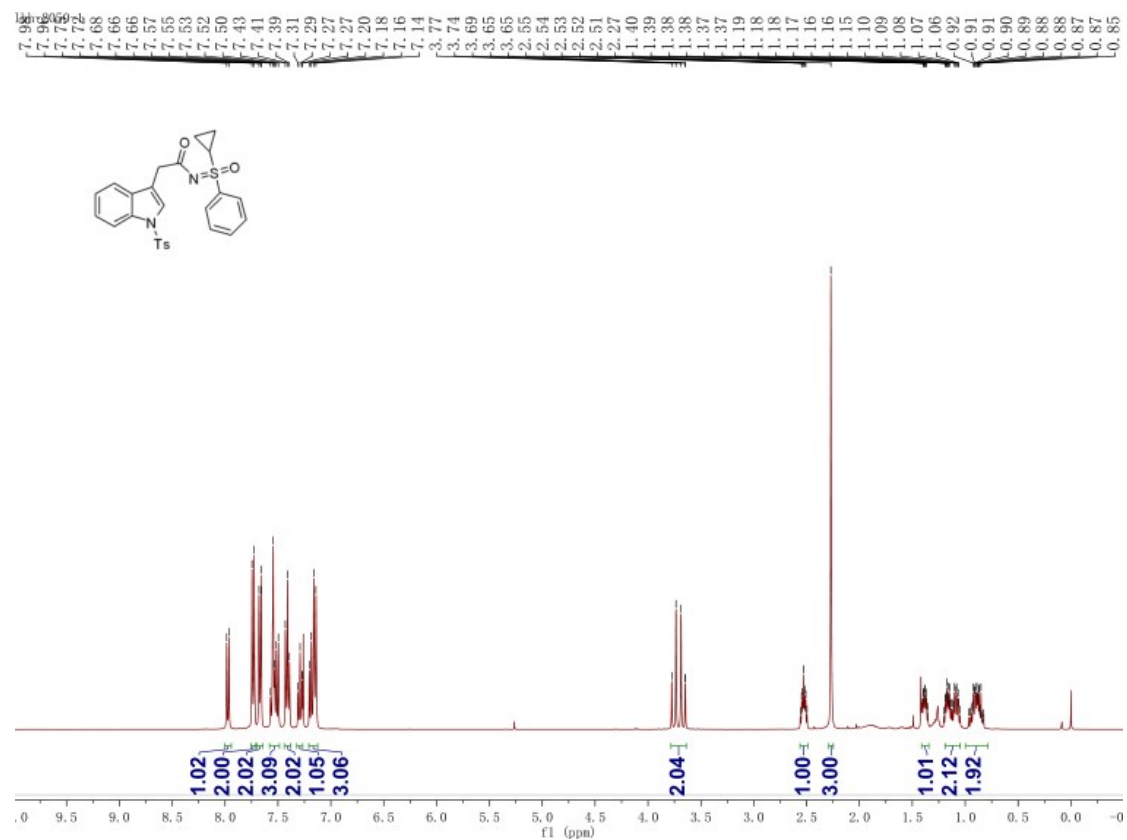

### <sup>13</sup>C NMR spectrum (100 MHz, CDCl<sub>3</sub>) of 4t

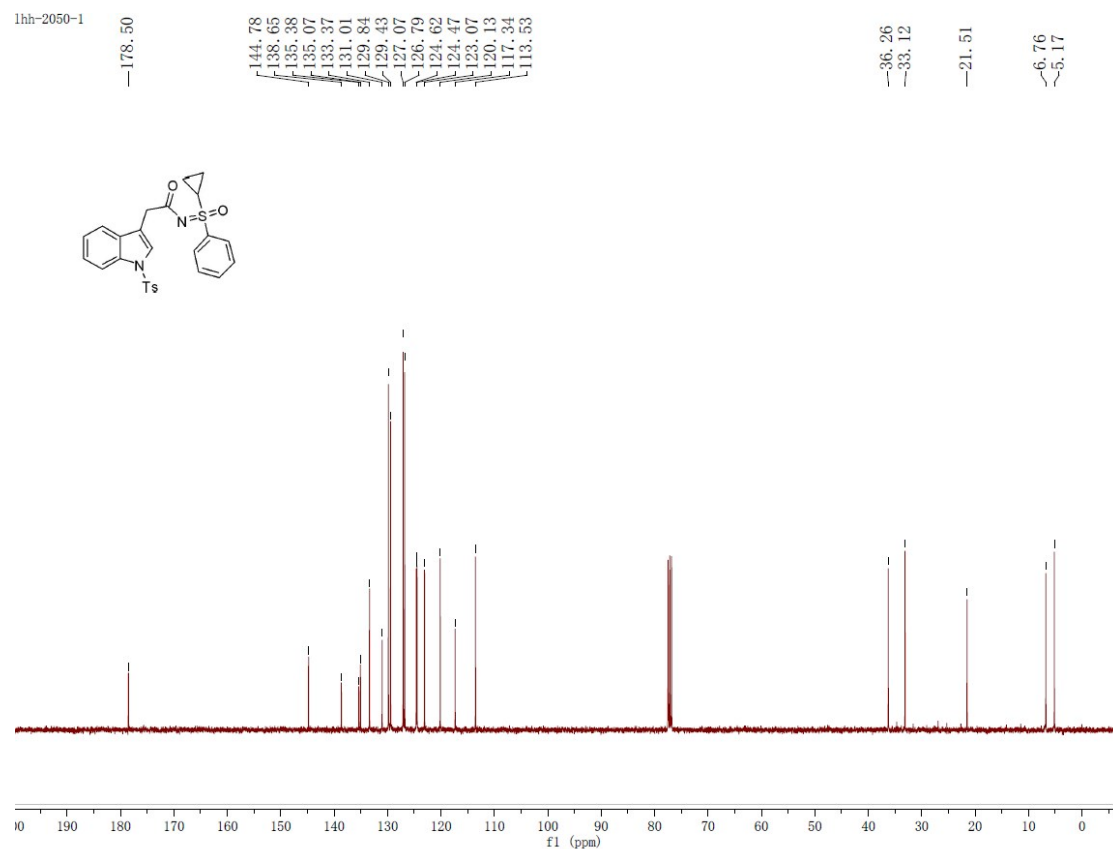

### <sup>1</sup>H NMR spectrum (400 MHz, CDCl<sub>3</sub>) of 4u

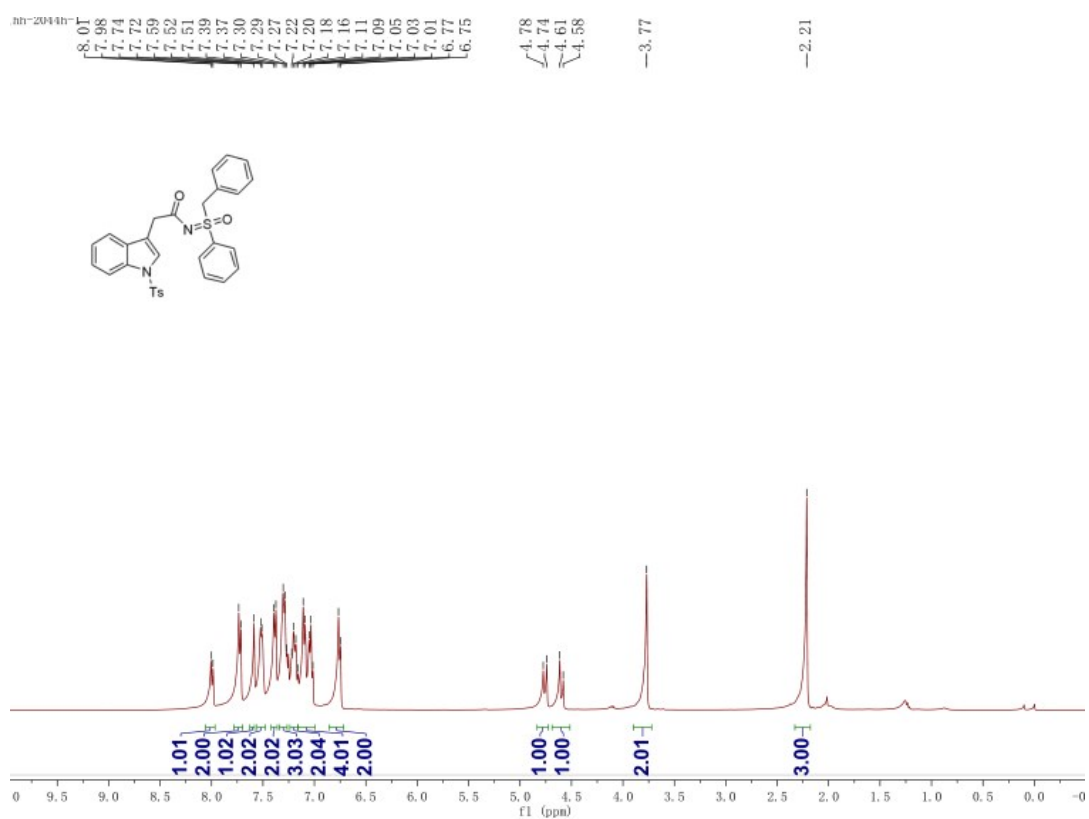

### <sup>13</sup>C NMR spectrum (100 MHz, CDCl<sub>3</sub>) of 4u

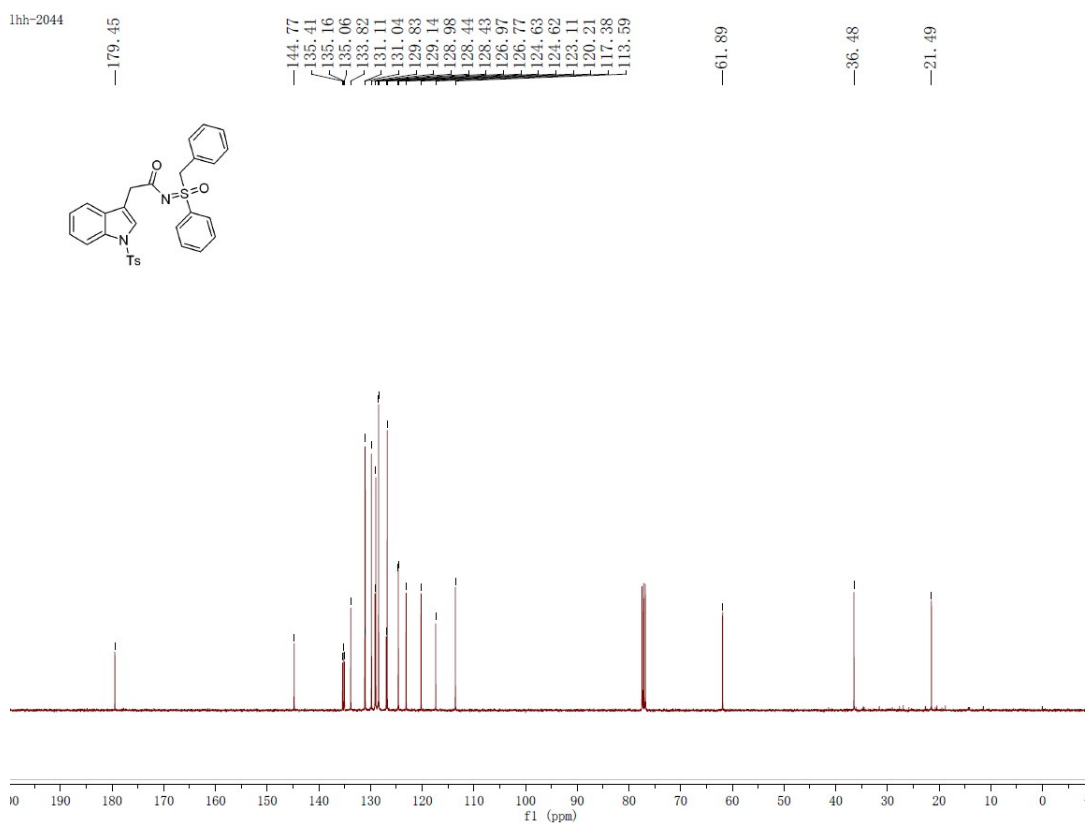

### <sup>1</sup>H NMR spectrum (400 MHz, CDCl<sub>3</sub>) of 4v

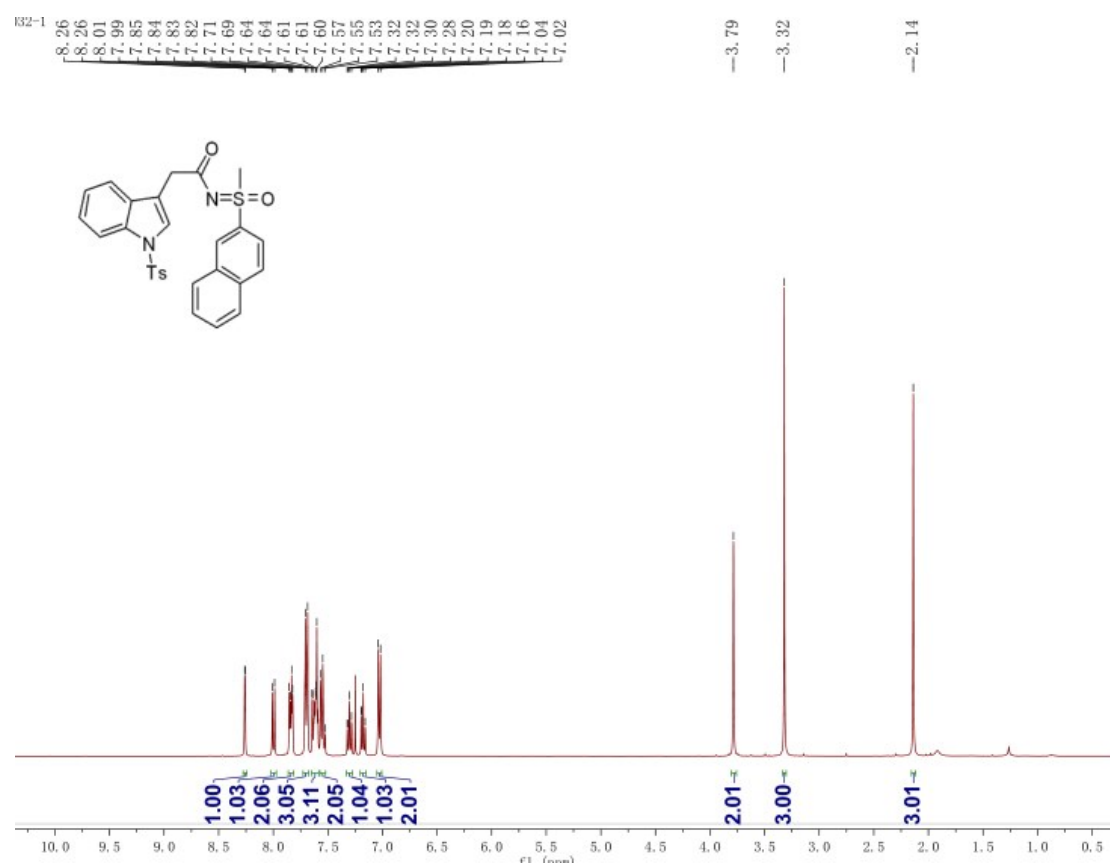

### <sup>13</sup>C NMR spectrum (100 MHz, CDCl<sub>3</sub>) of 4v

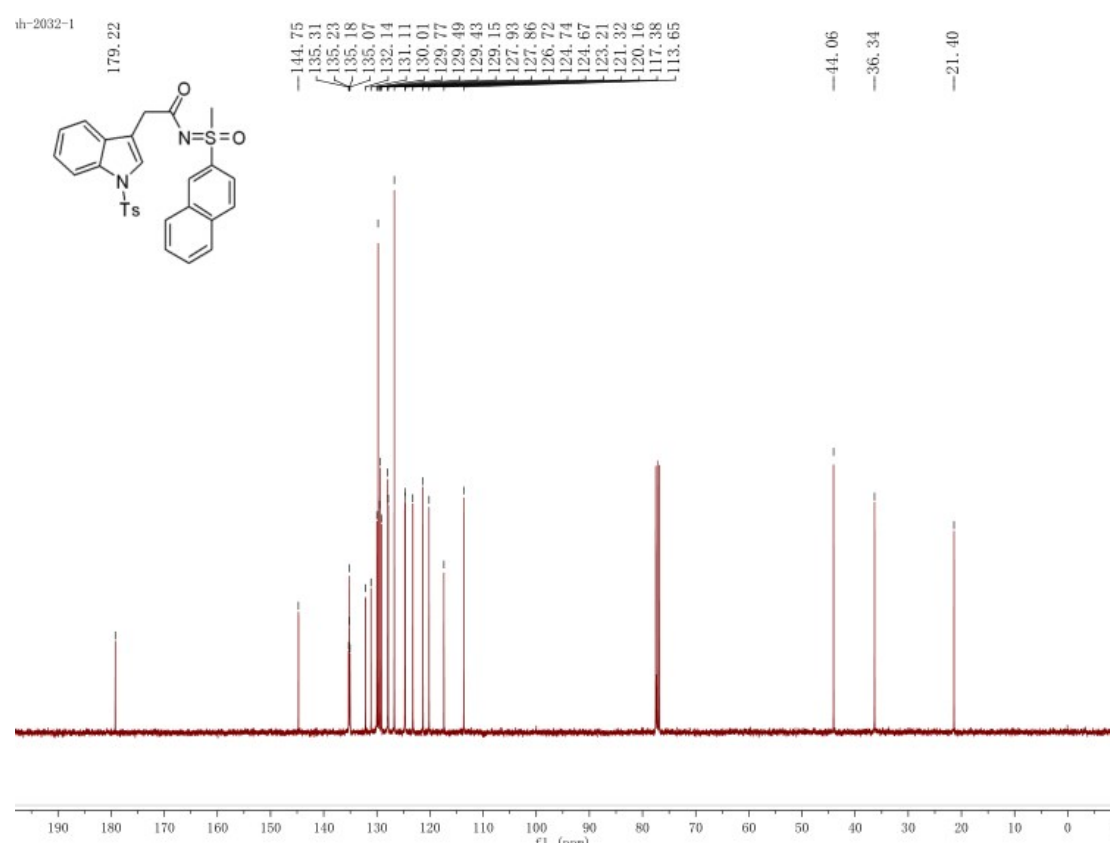

### <sup>1</sup>H NMR spectrum (400 MHz, CDCl<sub>3</sub>) of 4w

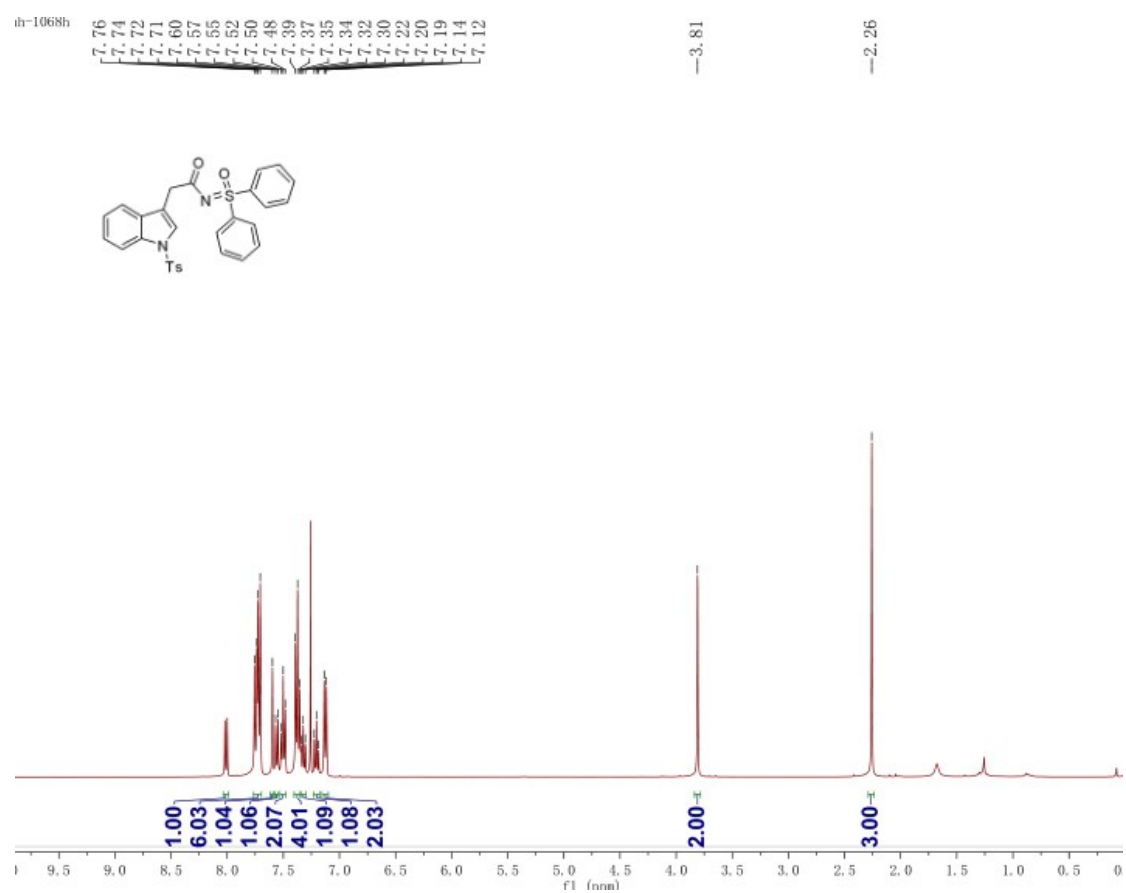

### <sup>13</sup>C NMR spectrum (100 MHz, CDCl<sub>3</sub>) of 4w

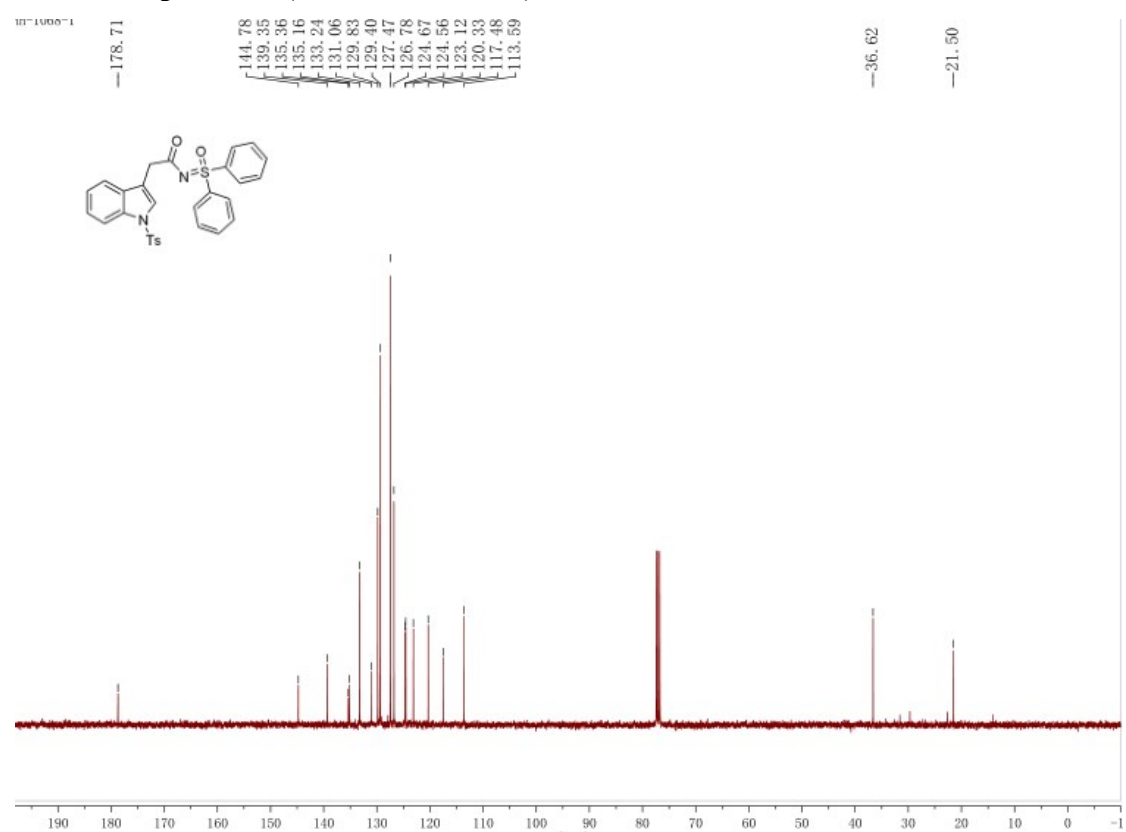

### $^1\text{H}$ NMR spectrum (400 MHz, $\text{CDCl}_3$ ) of 4x

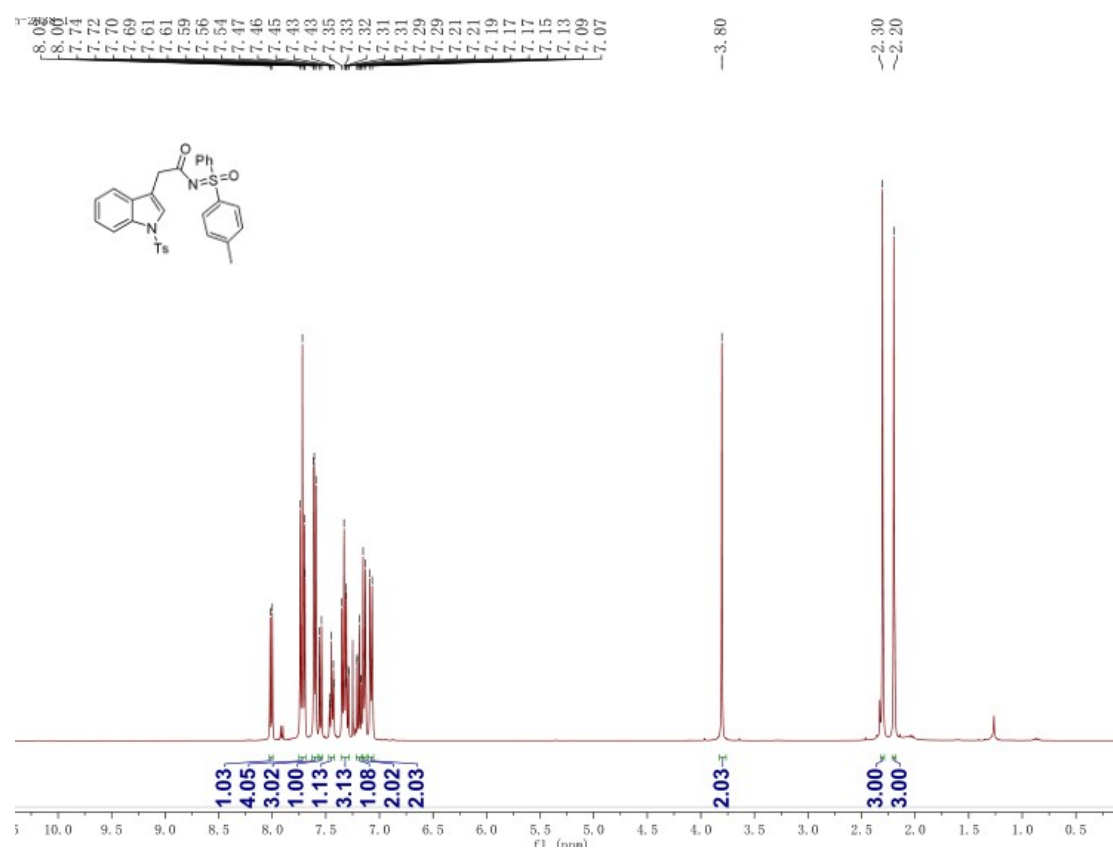

### $^{13}\text{C}$ NMR spectrum (100 MHz, $\text{CDCl}_3$ ) of 4x

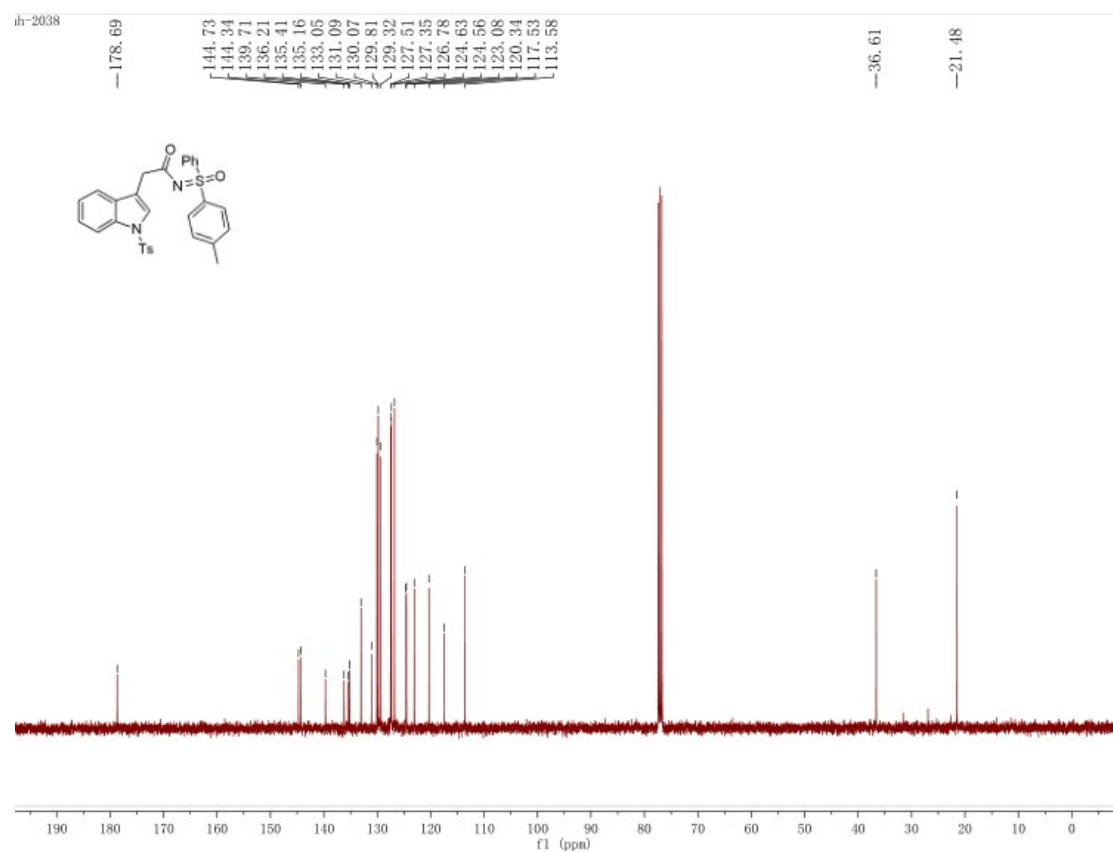

### <sup>1</sup>H NMR spectrum (400 MHz, CDCl<sub>3</sub>) of 4y

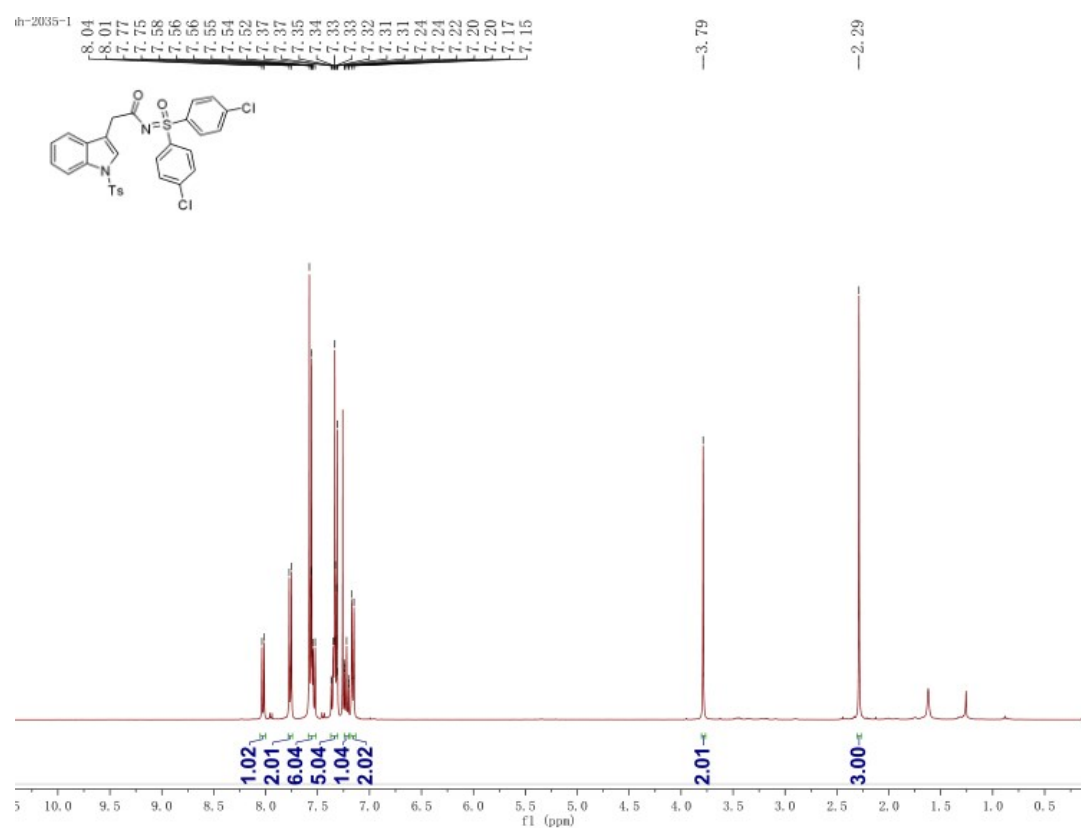

### <sup>13</sup>C NMR spectrum (100 MHz, CDCl<sub>3</sub>) of 4y

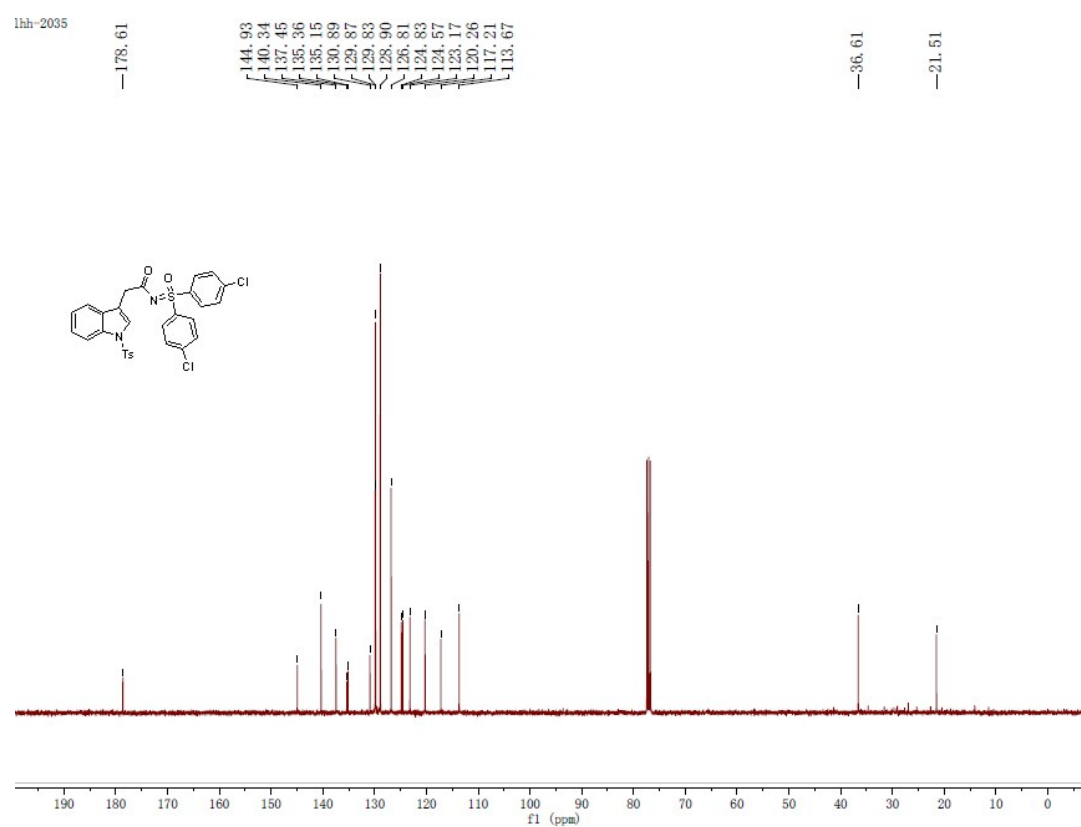

### <sup>1</sup>H NMR spectrum (400 MHz, CDCl<sub>3</sub>) of 4z

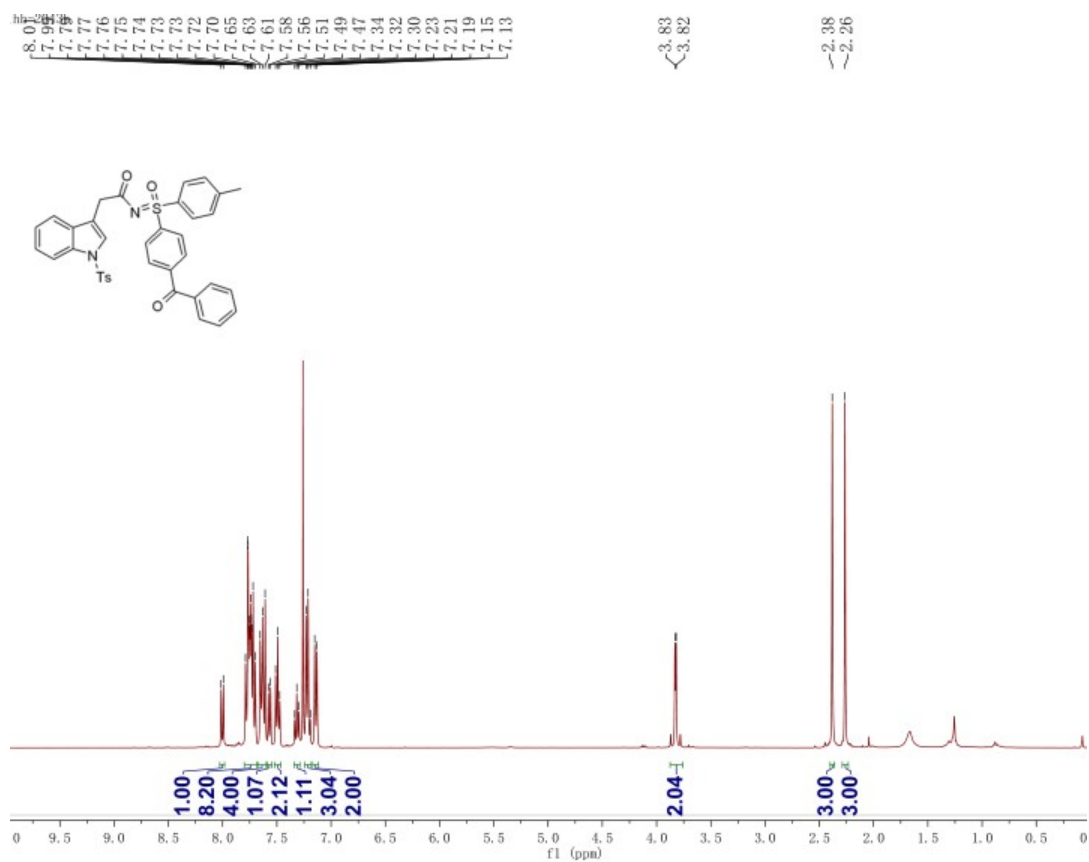

### <sup>13</sup>C NMR spectrum (100 MHz, CDCl<sub>3</sub>) of 4z

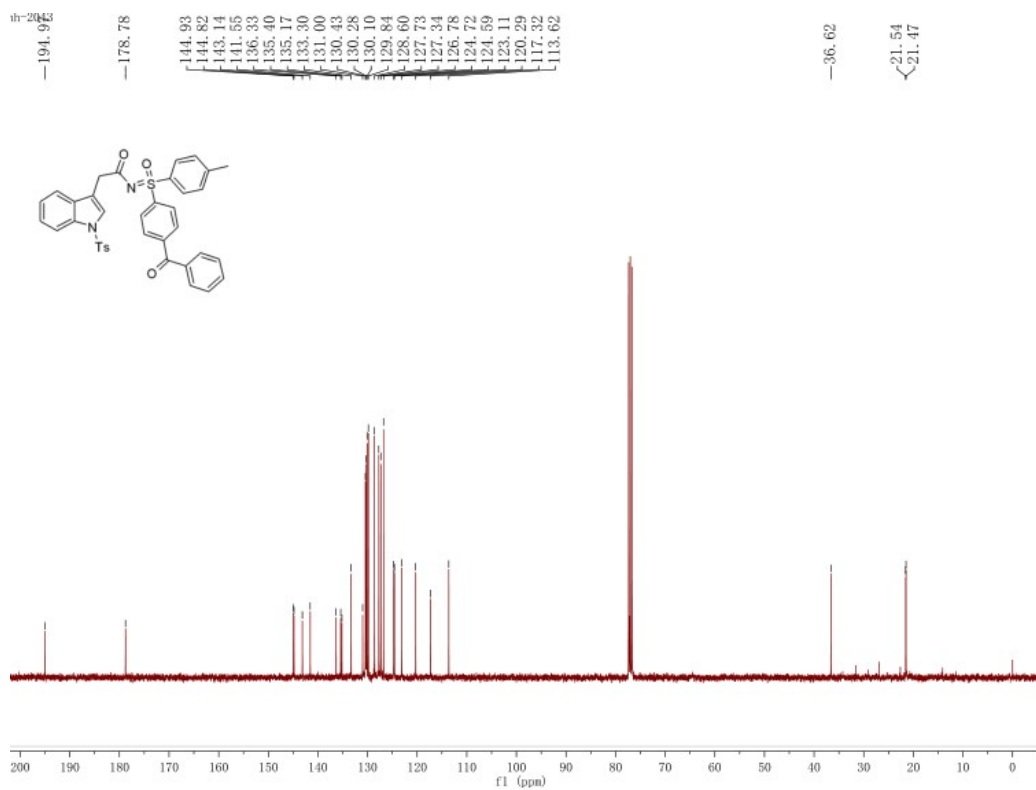

### <sup>1</sup>H NMR spectrum (400 MHz, CDCl<sub>3</sub>) of 6a

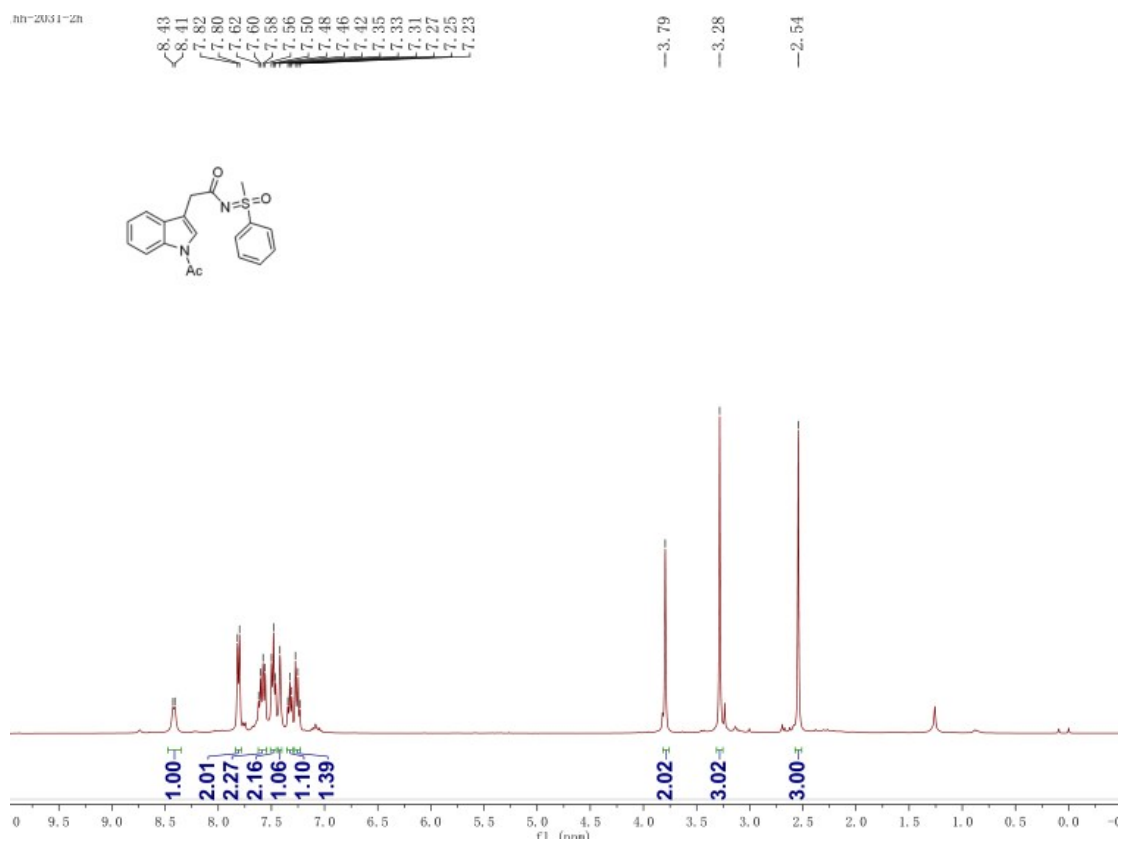

### <sup>13</sup>C NMR spectrum (100 MHz, CDCl<sub>3</sub>) of 6a

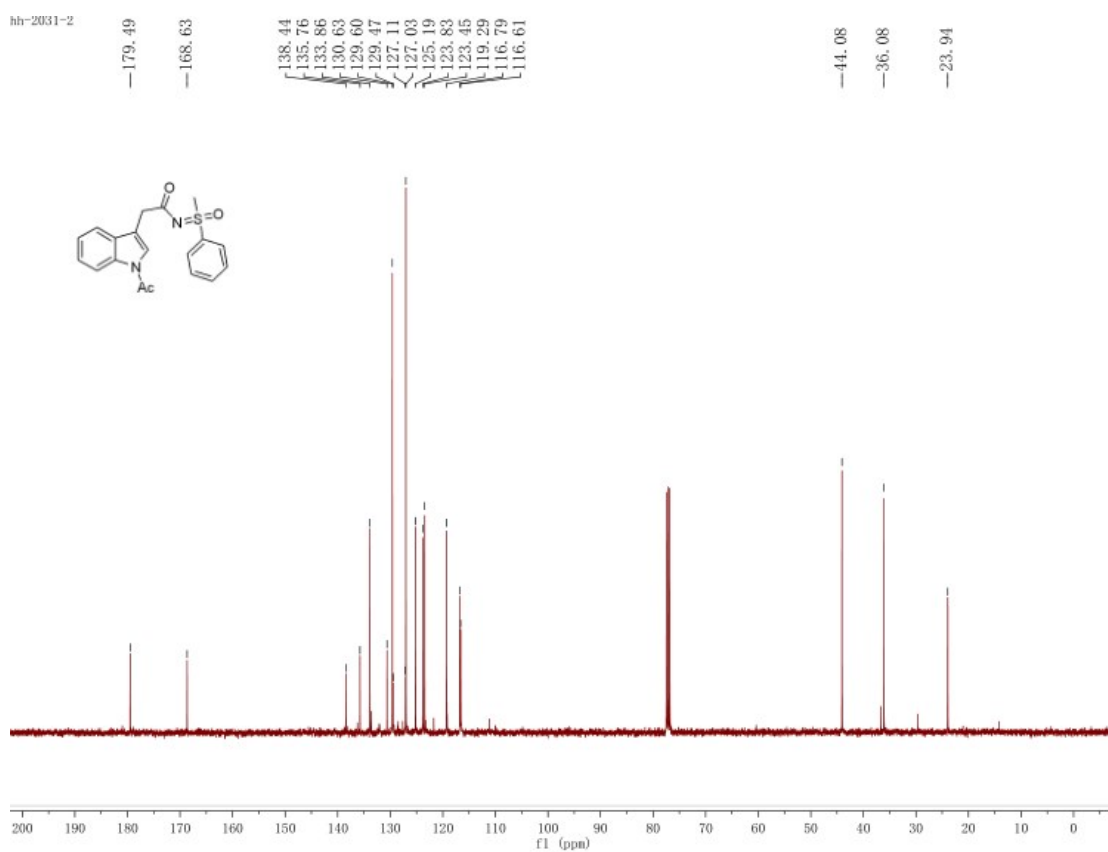



### $^1\text{H}$ NMR spectrum (400 MHz, $\text{CDCl}_3$ ) of 6b

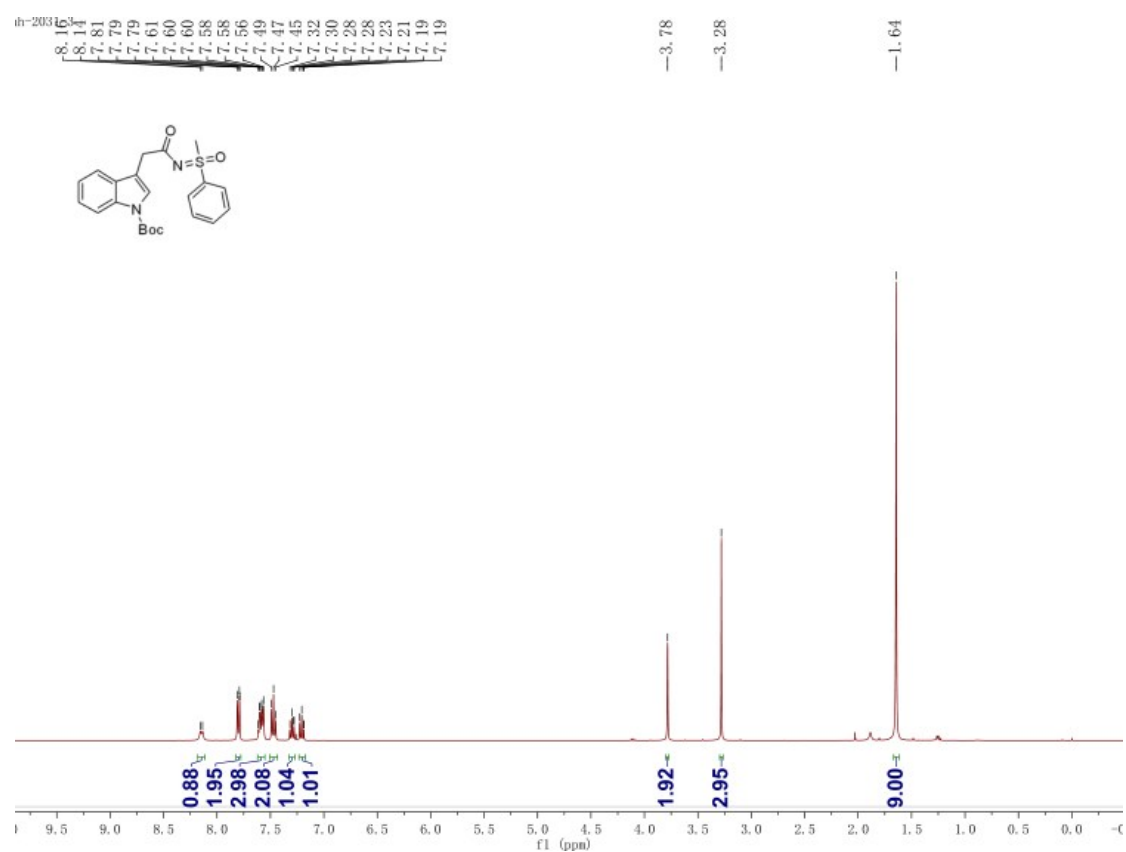

### $^{13}\text{C}$ NMR spectrum (100 MHz, $\text{CDCl}_3$ ) of 6b

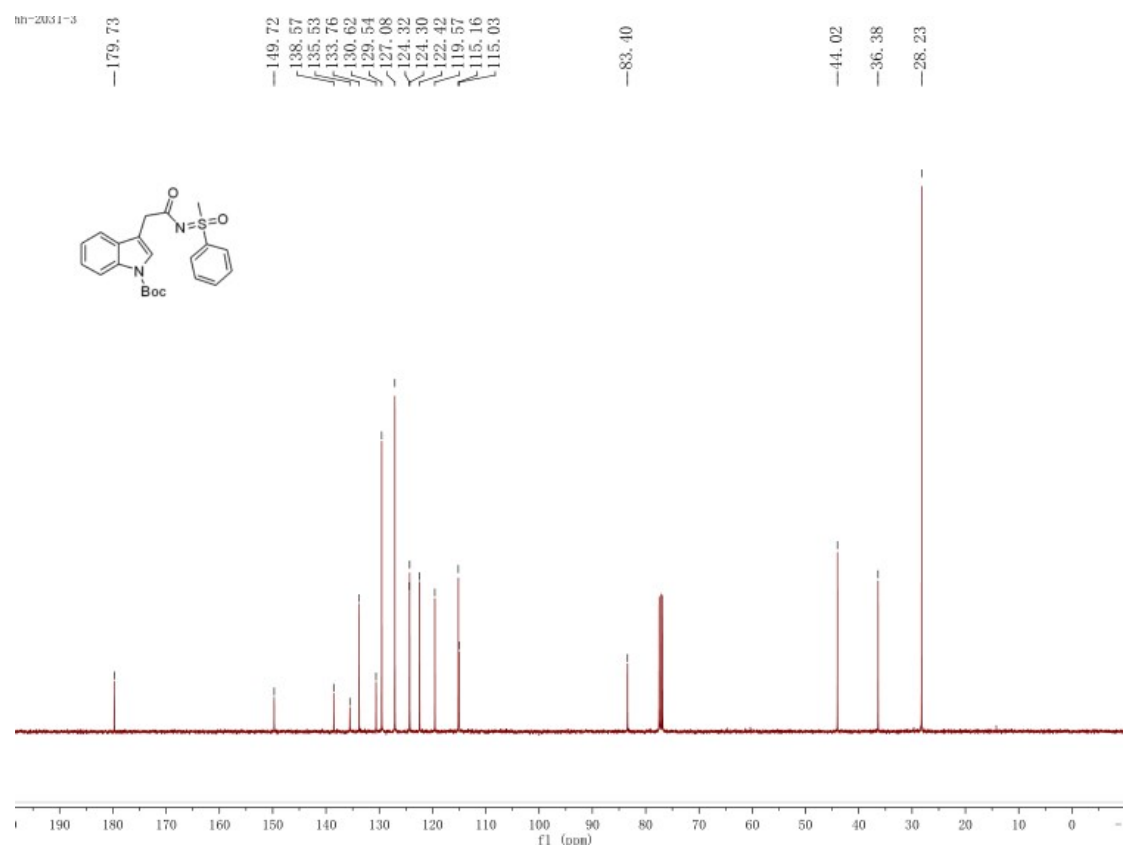

### $^1\text{H}$ NMR spectrum (400 MHz, $\text{CDCl}_3$ ) of **6c**

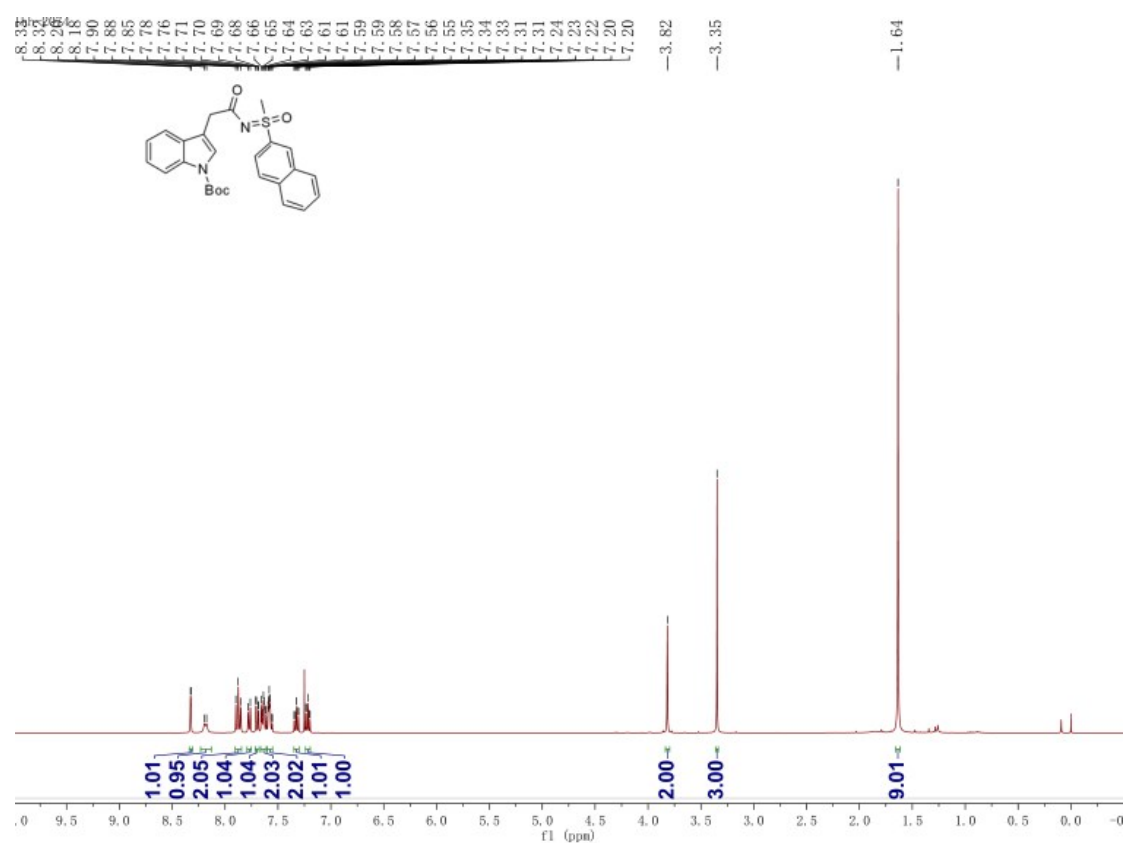

### $^{13}\text{C}$ NMR spectrum (100 MHz, $\text{CDCl}_3$ ) of **6c**

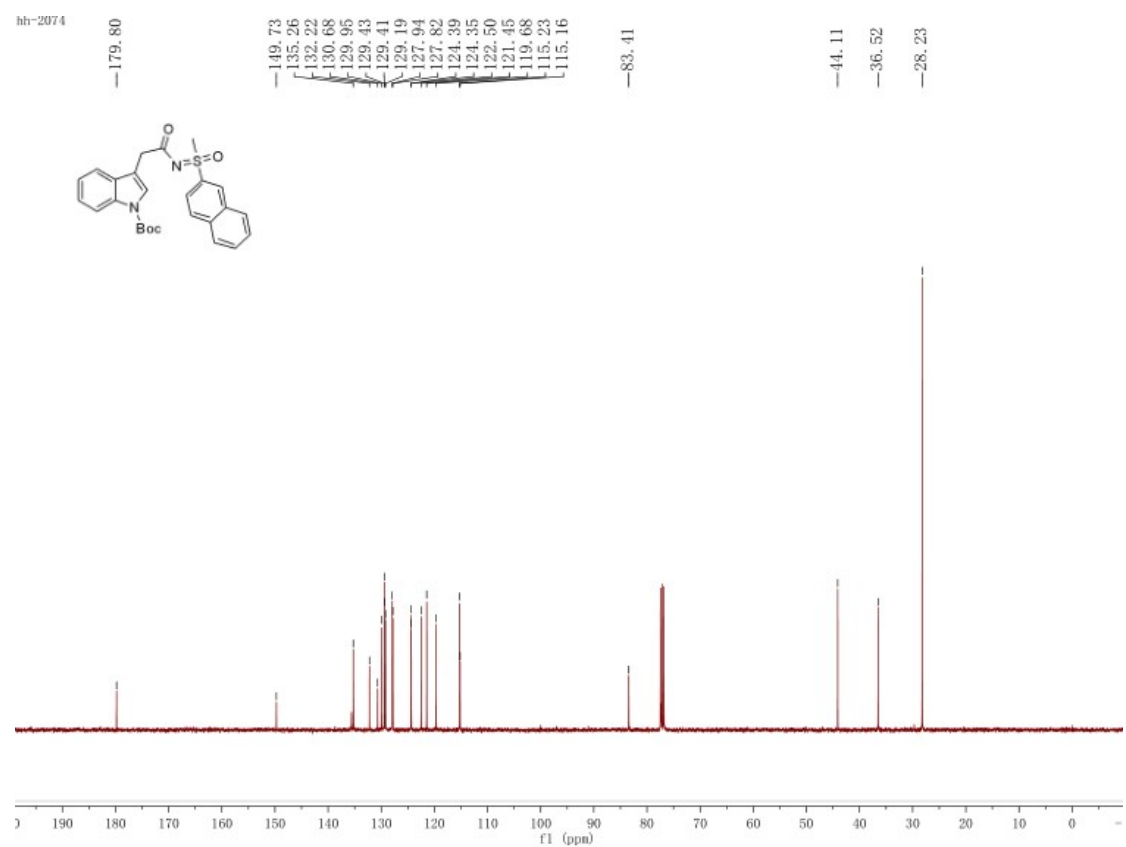

### $^1\text{H}$ NMR spectrum (400 MHz, $\text{CDCl}_3$ ) of 6d

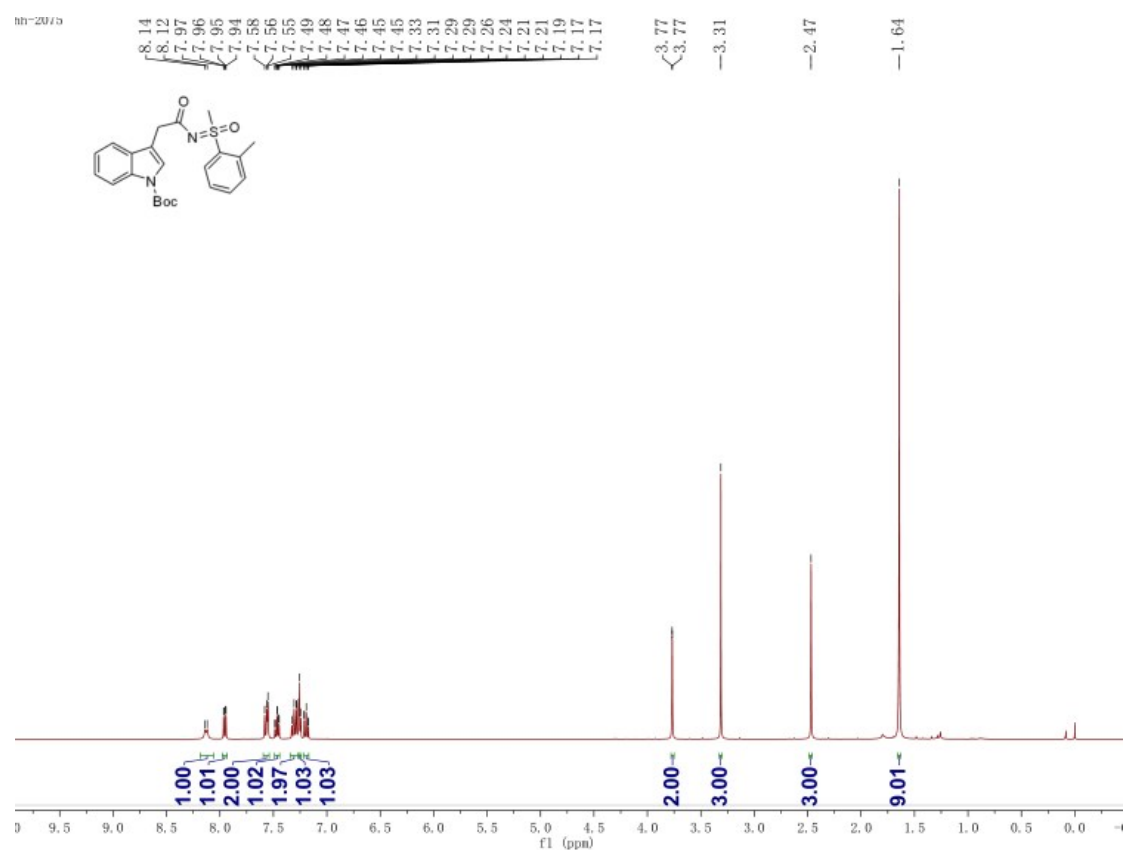

### $^{13}\text{C}$ NMR spectrum (100 MHz, $\text{CDCl}_3$ ) of 6d

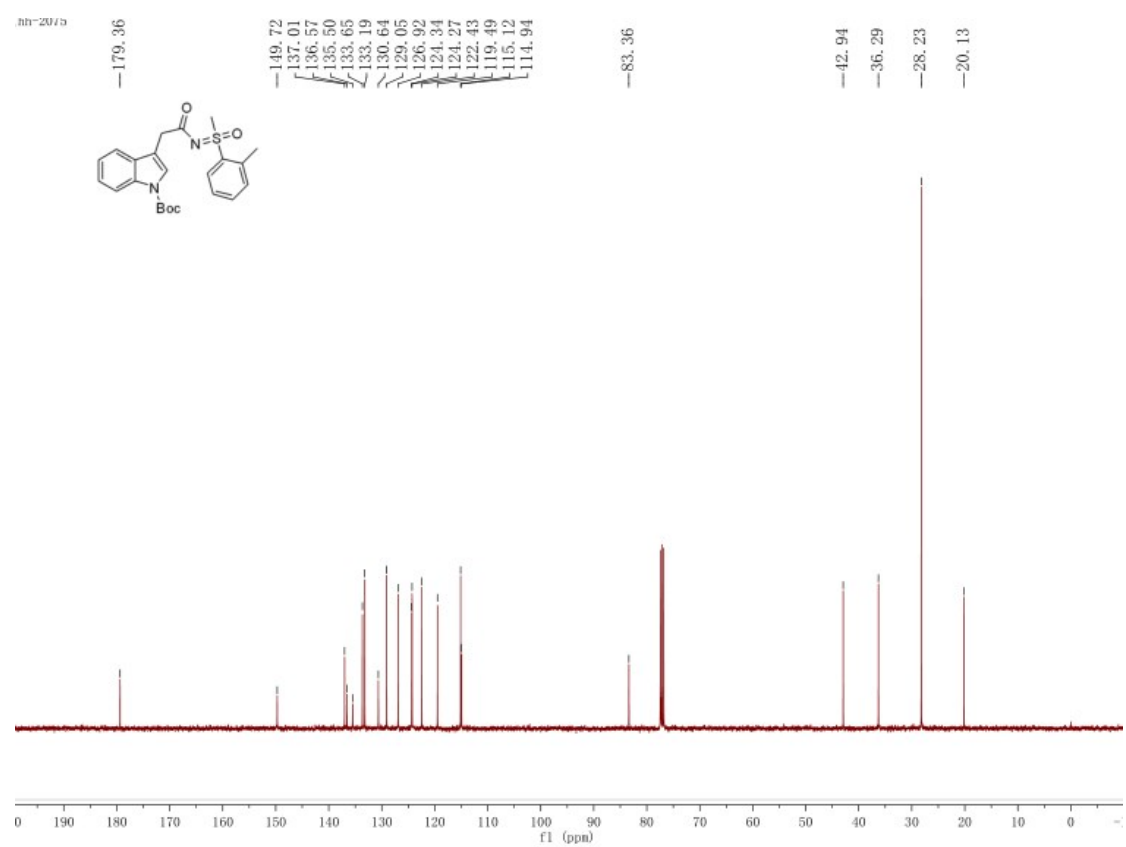

### <sup>1</sup>H NMR spectrum (400 MHz, CDCl<sub>3</sub>) of 6e

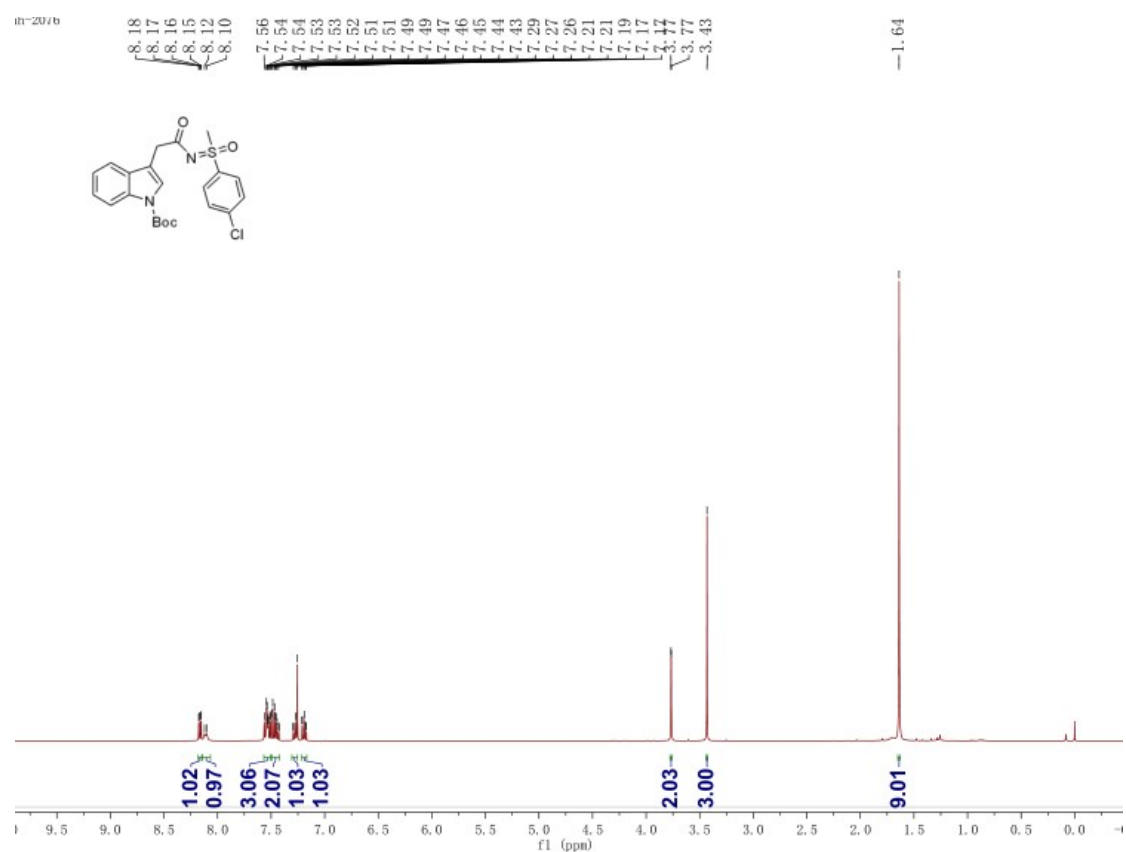

### <sup>13</sup>C NMR spectrum (100 MHz, CDCl<sub>3</sub>) of 6e

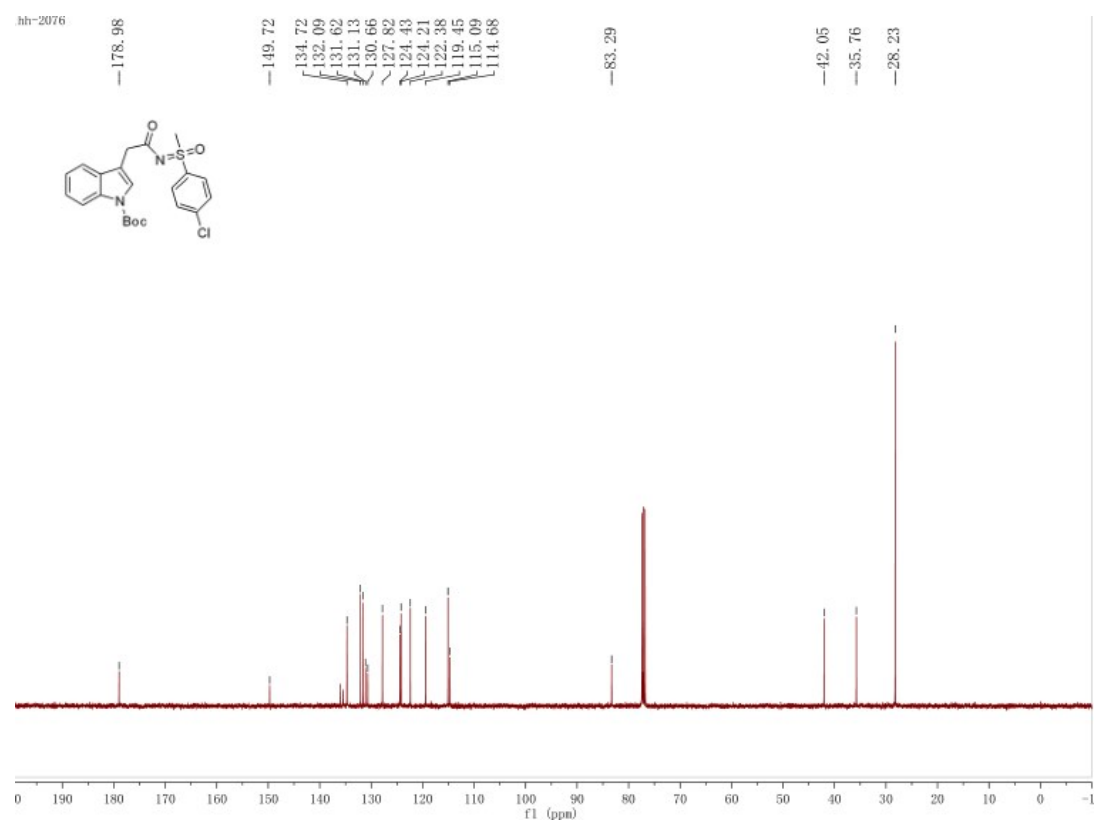

## 7. $^1\text{H}$ and $^{13}\text{C}$ NMR Spectra of compound 8.

### $^1\text{H}$ NMR spectrum (400 MHz, $\text{CDCl}_3$ ) of 8

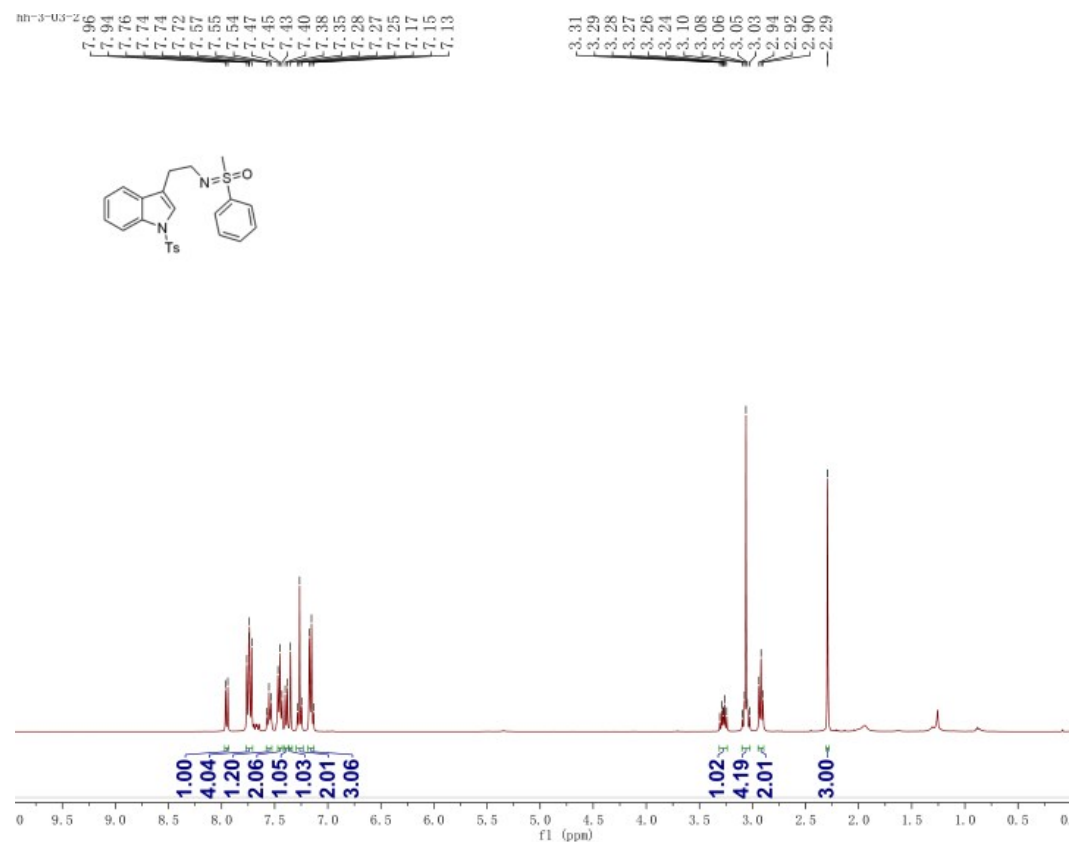

### $^{13}\text{C}$ NMR spectrum (100 MHz, $\text{CDCl}_3$ ) of 8

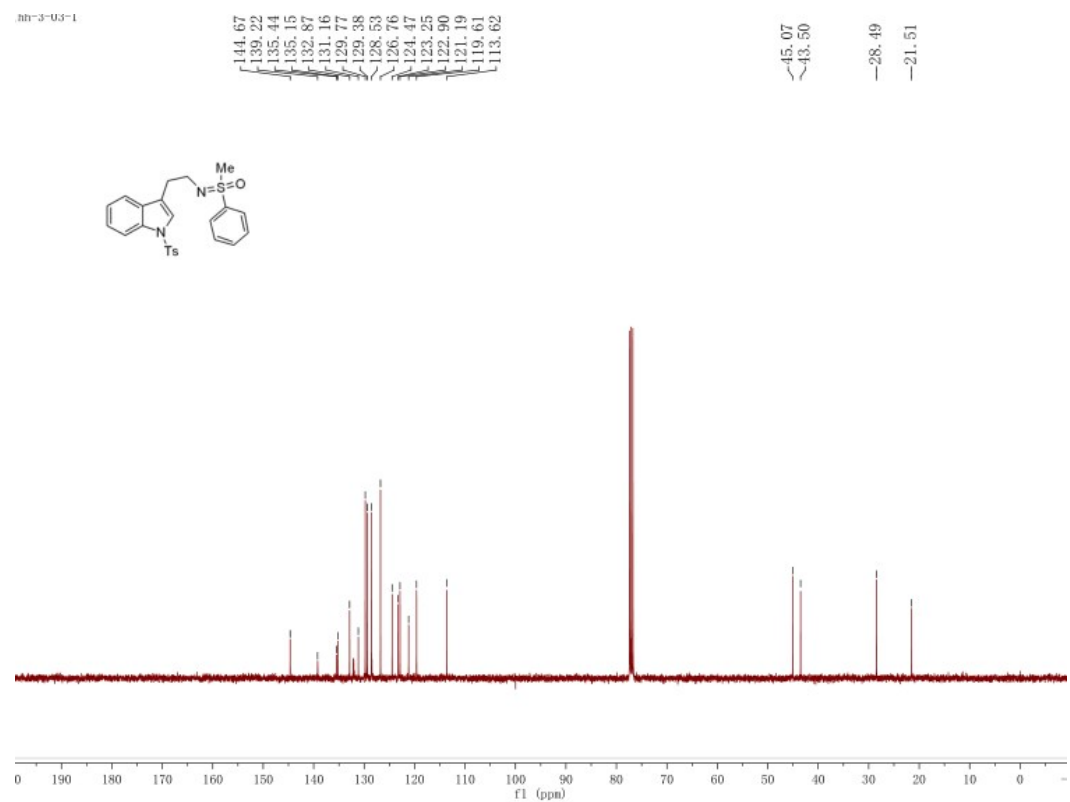

## 8. X-ray crystal structure of compound 4v.

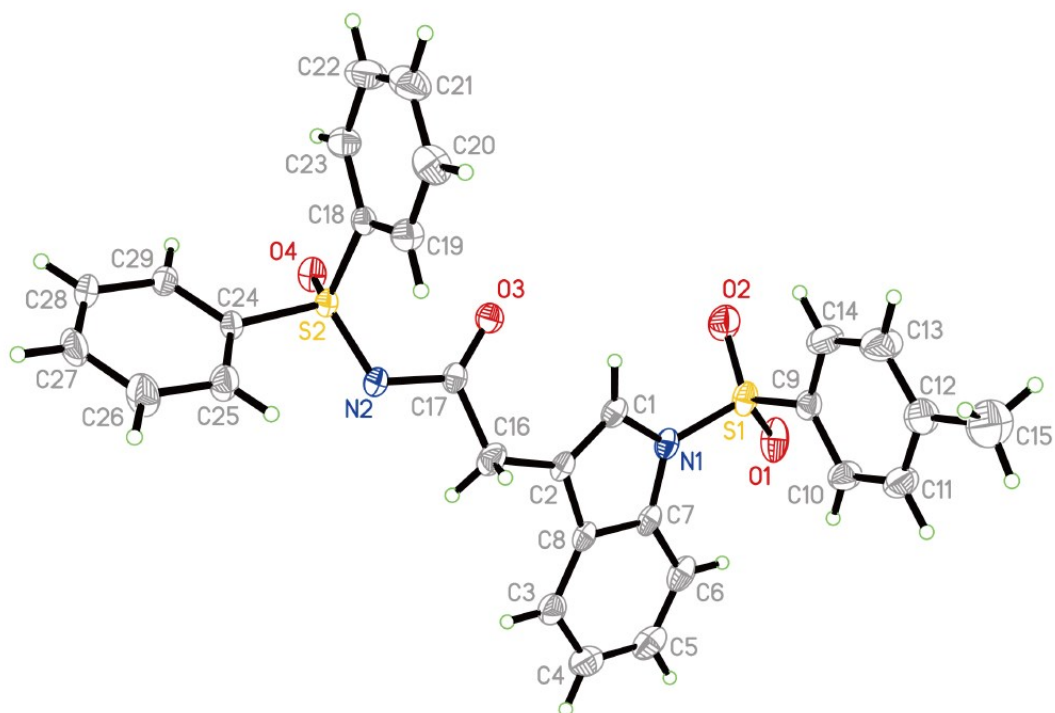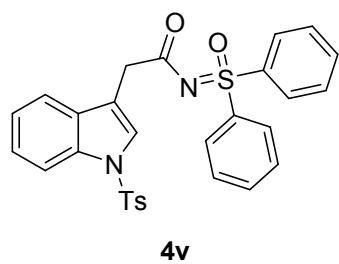

Supplement: d1ob00128k1.pdf [file d1ob00128k1.pdf]
